# Supplementary material for: Isolation, Structural Characterization and Antidiabetic Activity of New Diketopiperazine Alkaloids from Mangrove Endophytic Fungus Aspergillus sp. 16-5c
Source: MDPI journal article supplement (doi:10.3390/md19070402), 2021-07-20
Supplement: s1 [file s1]

## Supporting Information

### **Isolation, structural characterization and antidiabetic activity of new diketopiperazine alkaloids from mangrove endophytic fungus *Aspergillus* sp. 16-5c**

Geting Ye <sup>a</sup>, Cuiying Huang <sup>a</sup>, Jialin Li <sup>a</sup>, Tao Chen <sup>a</sup>, Jing Tang <sup>a</sup>, Wenbin Liu <sup>a</sup>, Yuhua Long <sup>a,\*</sup>

<sup>a</sup> *School of Chemistry, Guangzhou Key Laboratory of Analytical Chemistry for Biomedicine, South China Normal University, Guangzhou 510006, China.*

\* Correspondence: [longyh@scnu.edu.cn](mailto:longyh@scnu.edu.cn) (Y.L.)

## Table of Contents

|            |                                                                                                               |
|------------|---------------------------------------------------------------------------------------------------------------|
| Figure S1  | HRESIMS of compound <b>1</b>                                                                                  |
| Figure S2  | <sup>1</sup> H NMR spectrum (600 MHz, methanol- <i>d</i> <sub>4</sub> ) of compound <b>1</b>                  |
| Figure S3  | <sup>13</sup> C NMR spectrum (600 MHz, methanol- <i>d</i> <sub>4</sub> ) of compound <b>1</b>                 |
| Figure S4  | HMQC spectrum (600 MHz, methanol- <i>d</i> <sub>4</sub> ) of compound <b>1</b>                                |
| Figure S5  | HMBC spectrum (600 MHz, methanol- <i>d</i> <sub>4</sub> ) of compound <b>1</b>                                |
| Figure S6  | <sup>1</sup> H- <sup>1</sup> H COSY spectrum (600 MHz, methanol- <i>d</i> <sub>4</sub> ) of compound <b>1</b> |
| Figure S7  | NOESY spectrum (600 MHz, DMSO- <i>d</i> <sub>6</sub> ) of compound <b>1</b>                                   |
| Figure S8  | HRESIMS of compound <b>2</b>                                                                                  |
| Figure S9  | <sup>1</sup> H NMR spectrum (600 MHz, methanol- <i>d</i> <sub>4</sub> ) of compound <b>2</b>                  |
| Figure S10 | <sup>13</sup> C NMR spectrum (600 MHz, methanol- <i>d</i> <sub>4</sub> ) of compound <b>2</b>                 |
| Figure S11 | HMQC spectrum (600 MHz, methanol- <i>d</i> <sub>4</sub> ) of compound <b>2</b>                                |
| Figure S12 | HMBC spectrum (600 MHz, methanol- <i>d</i> <sub>4</sub> ) of compound <b>2</b>                                |
| Figure S13 | <sup>1</sup> H- <sup>1</sup> H COSY spectrum (600 MHz, DMSO- <i>d</i> <sub>4</sub> ) of compound <b>2</b>     |
| Figure S14 | NOESY spectrum (600 MHz, DMSO- <i>d</i> <sub>6</sub> ) of compound <b>2</b>                                   |
| Figure S15 | HRESIMS of compound <b>3</b>                                                                                  |
| Figure S16 | <sup>1</sup> H NMR spectrum (600 MHz, methanol- <i>d</i> <sub>4</sub> ) of compound <b>3</b>                  |
| Figure S17 | <sup>13</sup> C NMR spectrum (600 MHz, methanol- <i>d</i> <sub>4</sub> ) of compound <b>3</b>                 |
| Figure S18 | HMQC spectrum (600 MHz, methanol- <i>d</i> <sub>4</sub> ) of compound <b>3</b>                                |
| Figure S19 | HMBC spectrum (600 MHz, methanol- <i>d</i> <sub>4</sub> ) of compound <b>3</b>                                |
| Figure S20 | <sup>1</sup> H- <sup>1</sup> H COSY spectrum (600 MHz, methanol- <i>d</i> <sub>4</sub> ) of compound <b>3</b> |
| Figure S21 | NOESY spectrum (600 MHz, DMSO- <i>d</i> <sub>6</sub> ) of compound <b>3</b>                                   |
| Figure S22 | HRESIMS of compound <b>4</b>                                                                                  |
| Figure S23 | <sup>1</sup> H NMR spectrum (600 MHz, DMSO- <i>d</i> <sub>6</sub> ) of compound <b>4</b>                      |
| Figure S24 | <sup>13</sup> C NMR spectrum (600 MHz, DMSO- <i>d</i> <sub>6</sub> ) of compound <b>4</b>                     |
| Figure S25 | HMQC spectrum (600 MHz, DMSO- <i>d</i> <sub>6</sub> ) of compound <b>4</b>                                    |
| Figure S26 | HMBC spectrum (600 MHz, DMSO- <i>d</i> <sub>6</sub> ) of compound <b>4</b>                                    |
| Figure S27 | <sup>1</sup> H- <sup>1</sup> H COSY spectrum (600 MHz, DMSO- <i>d</i> <sub>6</sub> ) of compound <b>4</b>     |
| Figure S28 | NOESY spectrum (600 MHz, DMSO- <i>d</i> <sub>6</sub> ) of compound <b>4</b>                                   |
| Figure S29 | HRESIMS of compound <b>5</b>                                                                                  |
| Figure S30 | <sup>1</sup> H NMR spectrum (600 MHz, methanol- <i>d</i> <sub>4</sub> ) of compound <b>5</b>                  |
| Figure S31 | <sup>13</sup> C NMR spectrum (600 MHz, methanol- <i>d</i> <sub>4</sub> ) of compound <b>5</b>                 |
| Figure S32 | HMQC spectrum (600 MHz, methanol- <i>d</i> <sub>4</sub> ) of compound <b>5</b>                                |
| Figure S33 | HMBC spectrum (600 MHz, methanol- <i>d</i> <sub>4</sub> ) of compound <b>5</b>                                |
| Figure S34 | <sup>1</sup> H- <sup>1</sup> H COSY spectrum (600 MHz, methanol- <i>d</i> <sub>4</sub> ) of compound <b>5</b> |
| Figure S35 | HRESIMS of compound <b>6</b>                                                                                  |
| Figure S36 | <sup>1</sup> H NMR spectrum (600 MHz, methanol- <i>d</i> <sub>4</sub> ) of compound <b>6</b>                  |
| Figure S37 | <sup>13</sup> C NMR spectrum (600 MHz, methanol- <i>d</i> <sub>4</sub> ) of compound <b>6</b>                 |
| Figure S38 | HMQC spectrum (600 MHz, methanol- <i>d</i> <sub>4</sub> ) of compound <b>6</b>                                |
| Figure S39 | HMBC spectrum (600 MHz, methanol- <i>d</i> <sub>4</sub> ) of compound <b>6</b>                                |
| Figure S40 | <sup>1</sup> H- <sup>1</sup> H COSY spectrum (600 MHz, methanol- <i>d</i> <sub>4</sub> ) of compound <b>6</b> |
| Figure S41 | NOESY spectrum (600 MHz, DMSO- <i>d</i> <sub>6</sub> ) of compound <b>6</b>                                   |

Figure S42  $^1\text{H}$  NMR spectrum (600 MHz, methanol- $d_4$ ) of compound **7**  
Figure S43  $^{13}\text{C}$  NMR spectrum (600 MHz, methanol- $d_4$ ) of compound **7**  
Figure S44  $^1\text{H}$  NMR spectrum (600 MHz, methanol- $d_4$ ) of compound **8**  
Figure S45  $^{13}\text{C}$  NMR spectrum (600 MHz, methanol- $d_4$ ) of compound **8**  
Figure S46  $^1\text{H}$  NMR spectrum (600 MHz, chloroform - $d$ ) of compound **9**  
Figure S47  $^{13}\text{C}$  NMR spectrum (600 MHz, chloroform - $d$ ) of compound **9**  
Figure S48  $^1\text{H}$  NMR spectrum (600 MHz, methanol- $d_4$ ) of compound **10**  
Figure S49  $^{13}\text{C}$  NMR spectrum (600 MHz, methanol- $d_4$ ) of compound **10**  
Figure S50  $^1\text{H}$  NMR spectrum (600 MHz, chloroform - $d$ ) of compound **11**  
Figure S51  $^{13}\text{C}$  NMR spectrum (600 MHz, chloroform - $d$ ) of compound **11**  
Figure S52  $^1\text{H}$  NMR spectrum (600 MHz, chloroform - $d$ ) of compound **12**  
Figure S53  $^{13}\text{C}$  NMR spectrum (600 MHz, chloroform - $d$ ) of compound **12**  
Figure S54  $^1\text{H}$  NMR spectrum (600 MHz, methanol- $d_4$ ) of compound **13**  
Figure S55  $^{13}\text{C}$  NMR spectrum (600 MHz, methanol- $d_4$ ) of compound **13**  
Figure S56  $^1\text{H}$  NMR spectrum (600 MHz, DMSO- $d_6$ ) of compound **14**  
Figure S57  $^{13}\text{C}$  NMR spectrum (600 MHz, DMSO- $d_6$ ) of compound **14**  
Figure S58  $^1\text{H}$  NMR spectrum (600 MHz, DMSO- $d_6$ ) of compound **15**  
Figure S59  $^{13}\text{C}$  NMR spectrum (600 MHz, DMSO- $d_6$ ) of compound **15**  
Figure S60  $^1\text{H}$  NMR spectrum (600 MHz, acetone- $d_6$ ) of compound **16**  
Figure S61  $^{13}\text{C}$  NMR spectrum (600 MHz, acetone- $d_6$ ) of compound **16**

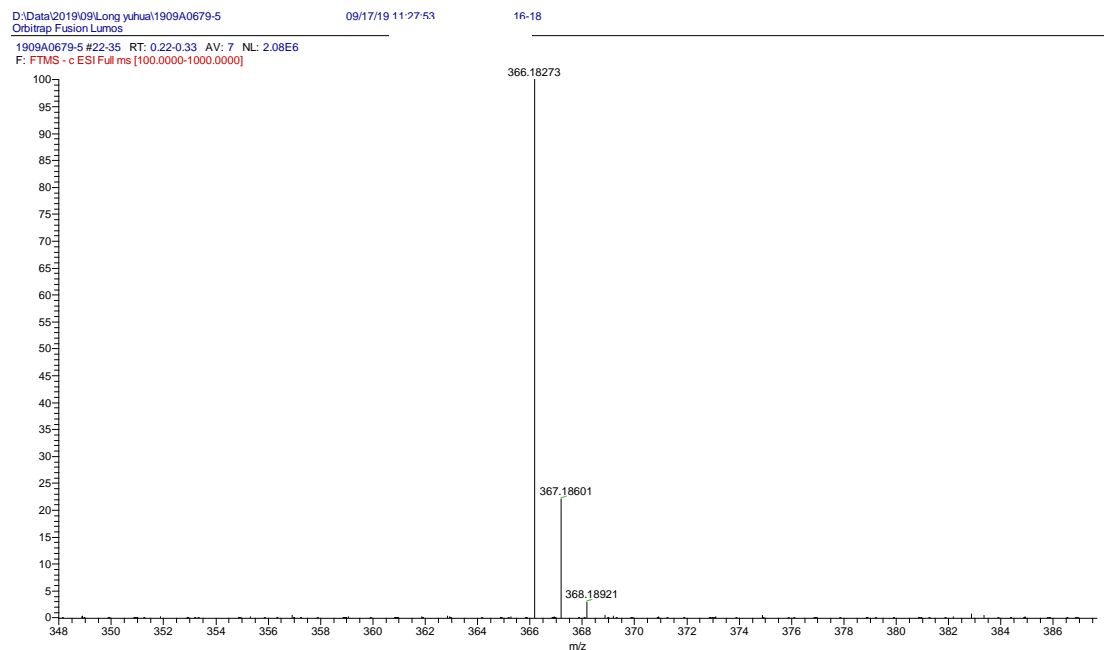

SPECTRUM - simulation :

| m/z       | Theo. Mass | Delta (ppm) | RDB equiv. | Composition                                                   |
|-----------|------------|-------------|------------|---------------------------------------------------------------|
| 366.18273 | 366.18231  | 1.13        | 11.5       | C <sub>21</sub> H <sub>24</sub> O <sub>3</sub> N <sub>3</sub> |

Figure S1 HRESIMS of compound **1**

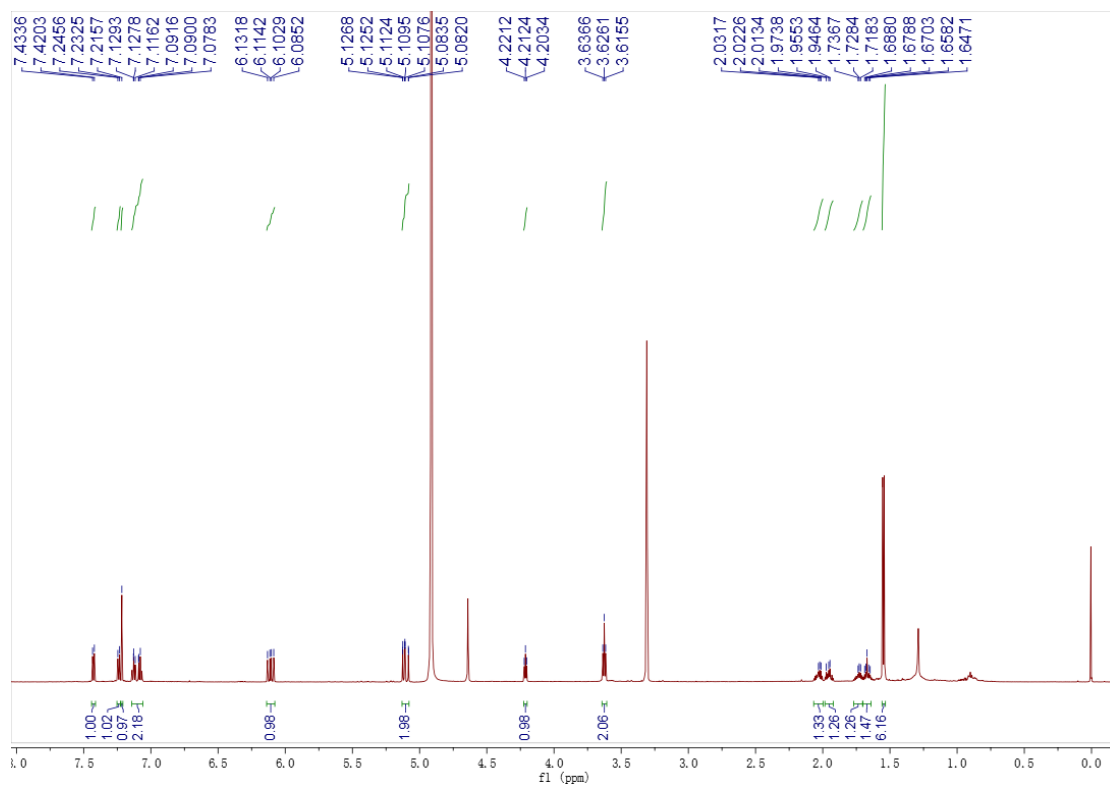

Figure S2 <sup>1</sup>H NMR spectrum (600 MHz, methanol-*d*<sub>4</sub>) of compound **1**

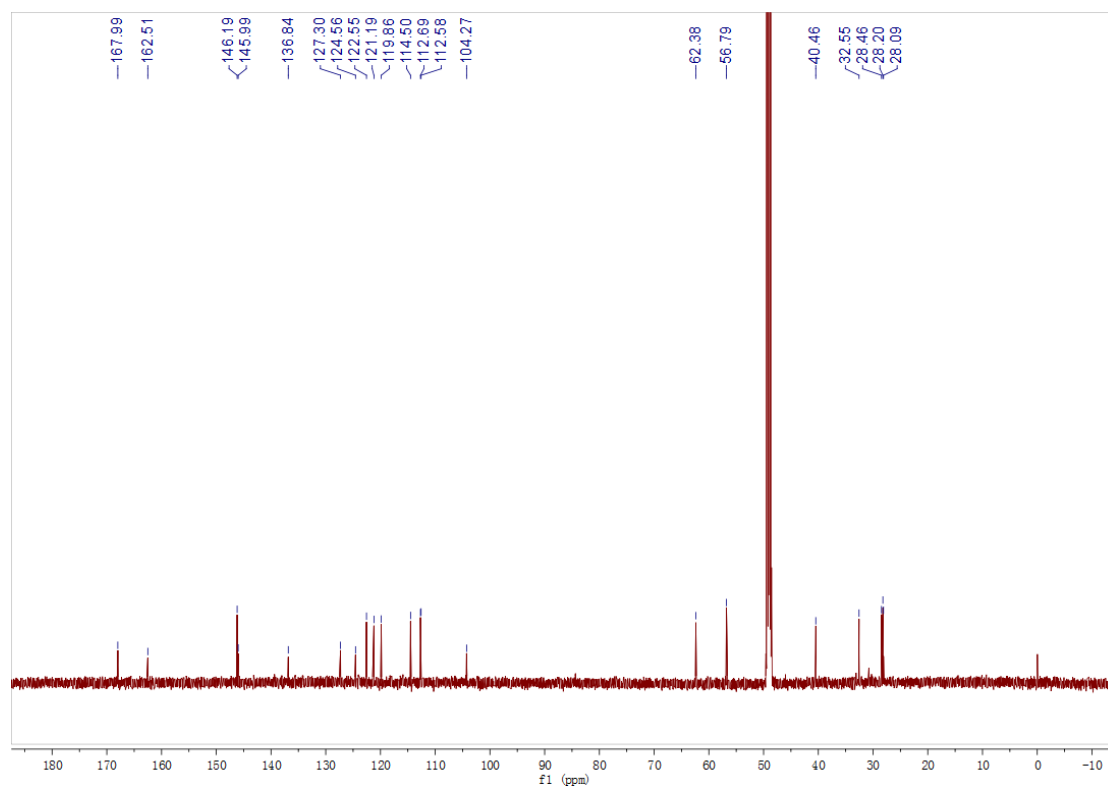

Figure S3  $^{13}\text{C}$  NMR spectrum (600 MHz, methanol- $d_4$ ) of compound **1**

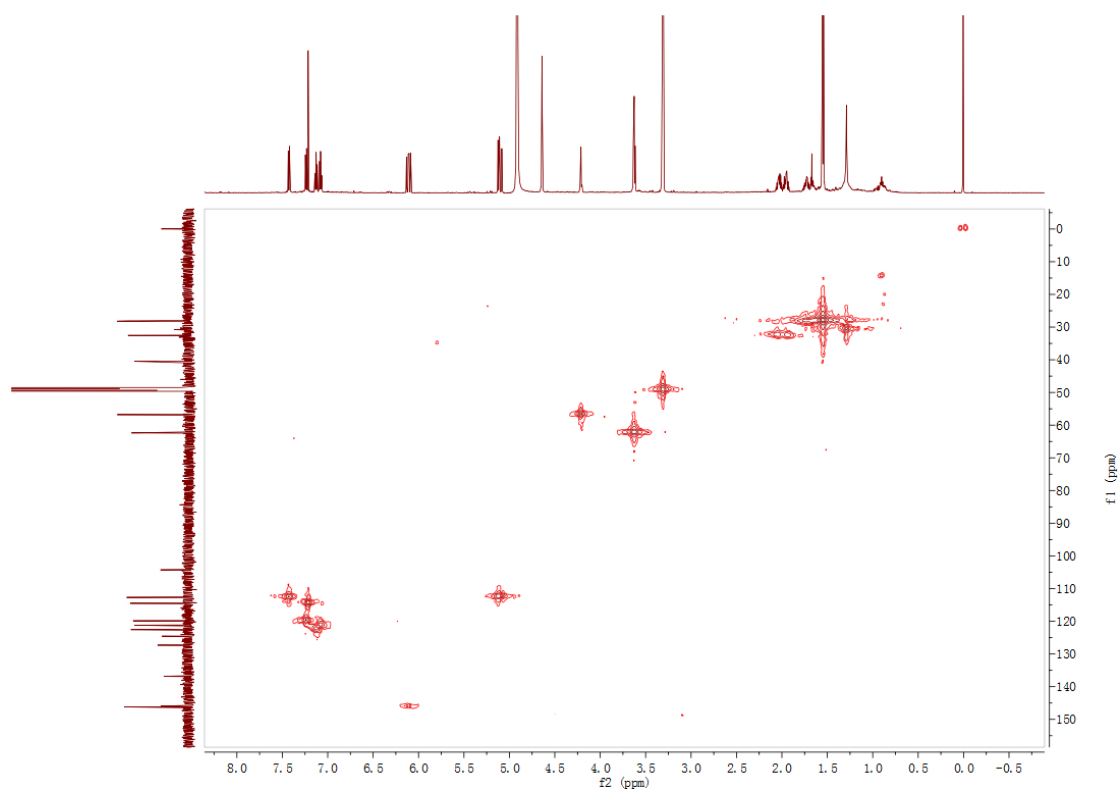

Fig.S4 HMQC spectrum (600 MHz, methanol- $d_4$ ) of compound **1**

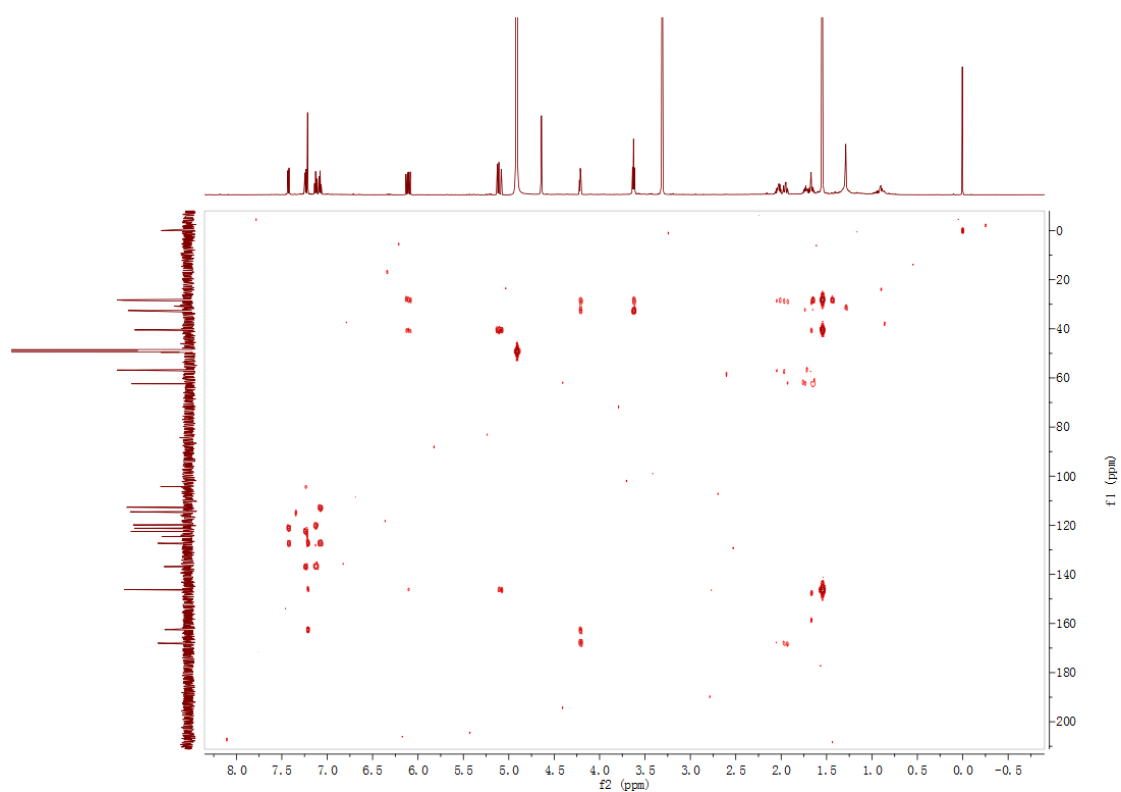

Figure S5 HMBC spectrum (600 MHz, methanol- $d_4$ ) of compound **1**

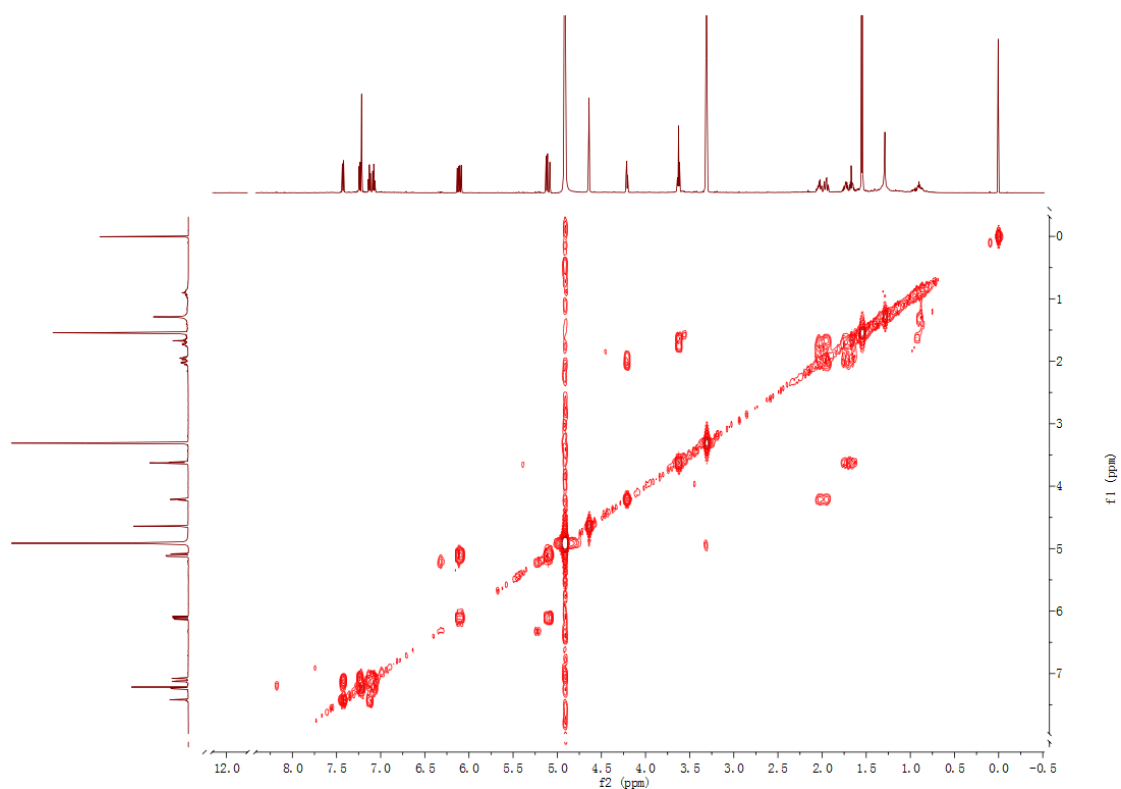

Figure S6  $^1\text{H}$ - $^1\text{H}$  COSY spectrum (600 MHz, methanol- $d_4$ ) of compound **1**

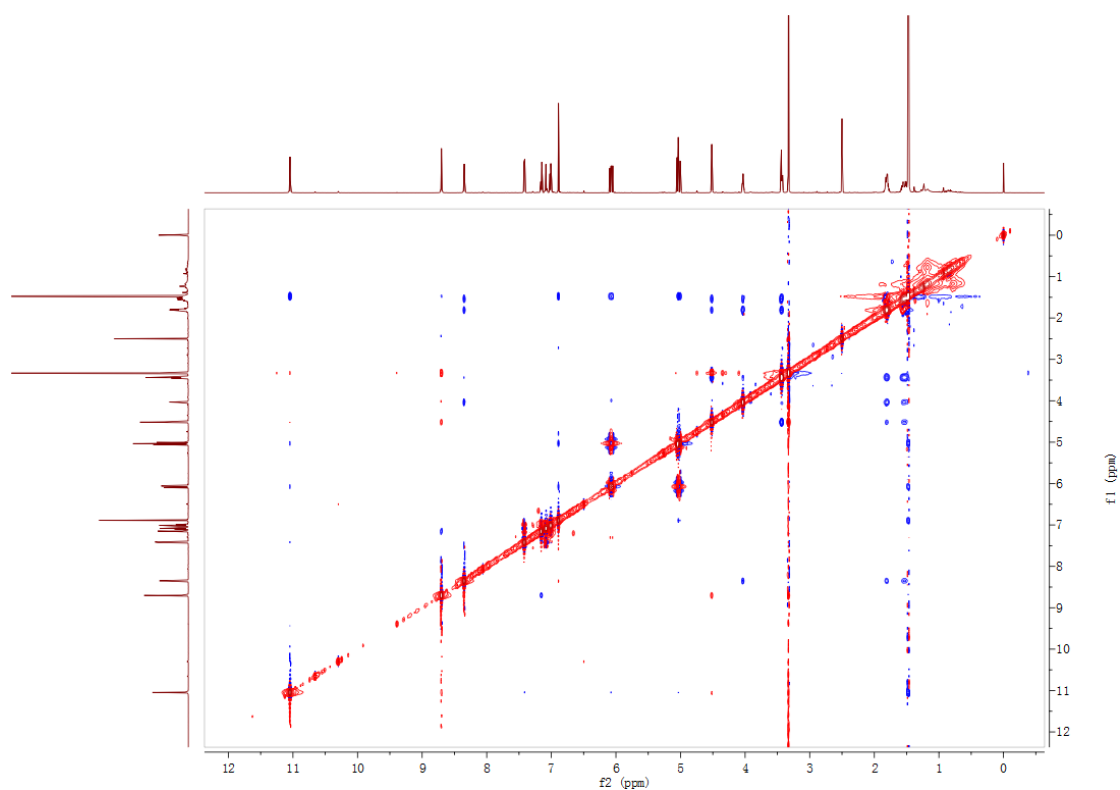

Figure S7 NOESY spectrum (600 MHz, DMSO- $d_6$ ) of compound **1**

#### Acquisition Parameter

|             |          |                      |          |                  |           |
|-------------|----------|----------------------|----------|------------------|-----------|
| Source Type | ESI      | Ion Polarity         | Positive | Set Nebulizer    | 0.4 Bar   |
| Focus       | Active   | Set Capillary        | 4500 V   | Set Dry Heater   | 180 °C    |
| Scan Begin  | 70 m/z   | Set End Plate Offset | -500 V   | Set Dry Gas      | 4.0 l/min |
| Scan End    | 1500 m/z | Set Charging Voltage | 0 V      | Set Divert Valve | Waste     |
|             |          | Set Corona           | 0 nA     | Set APCI Heater  | 0 °C      |

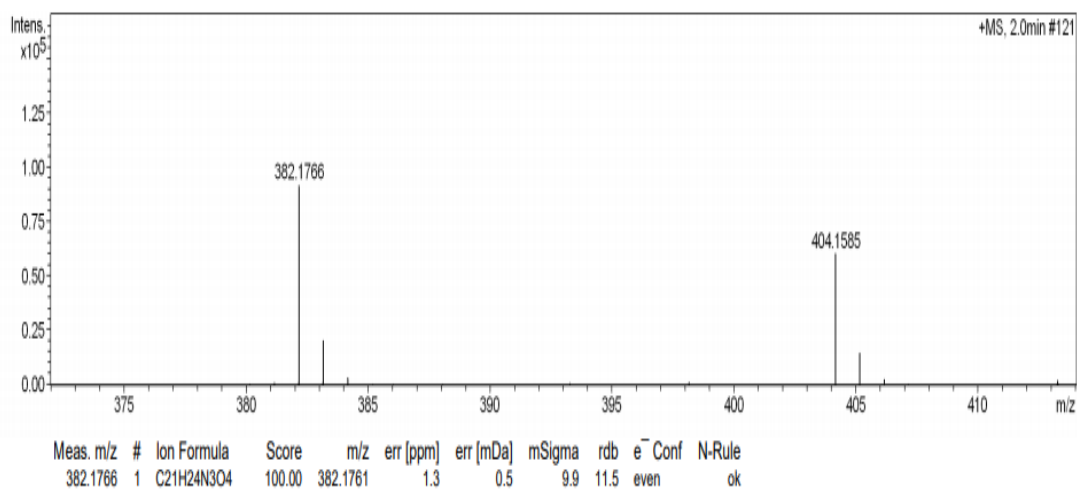

Figure S8 HRESIMS of compound **2**

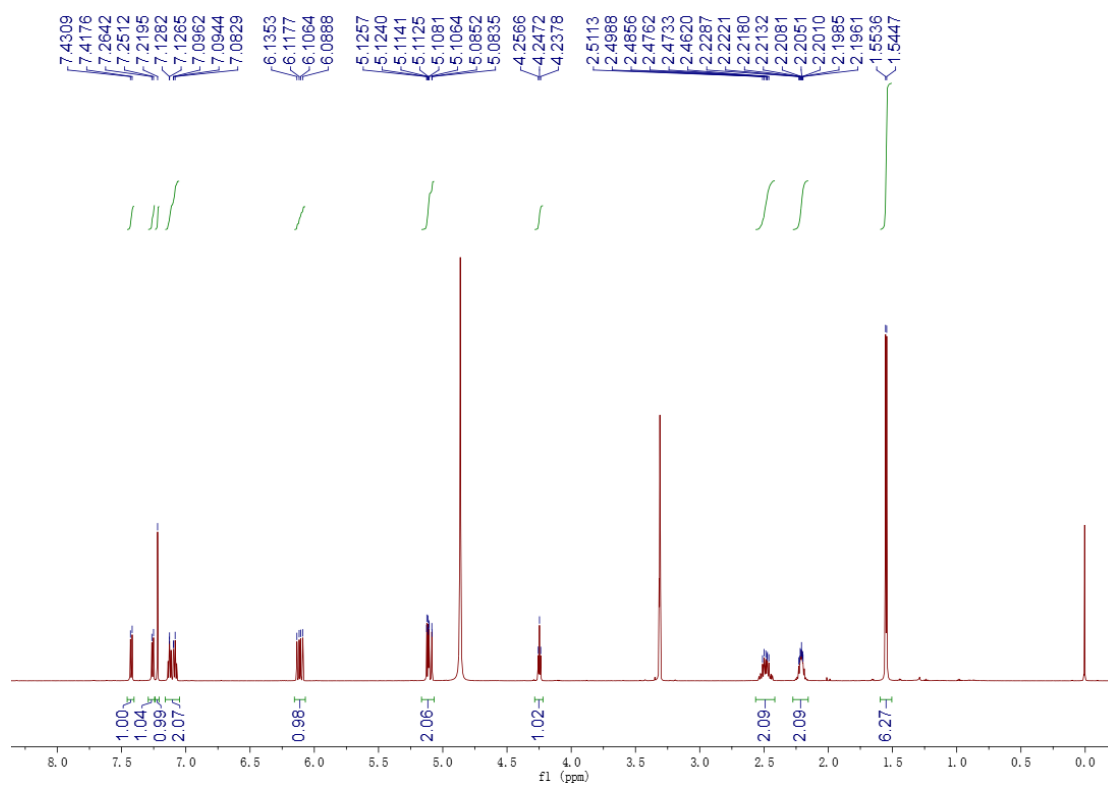

Figure S9 <sup>1</sup>H NMR spectrum (600 MHz, methanol-*d*<sub>4</sub>) of compound **2**

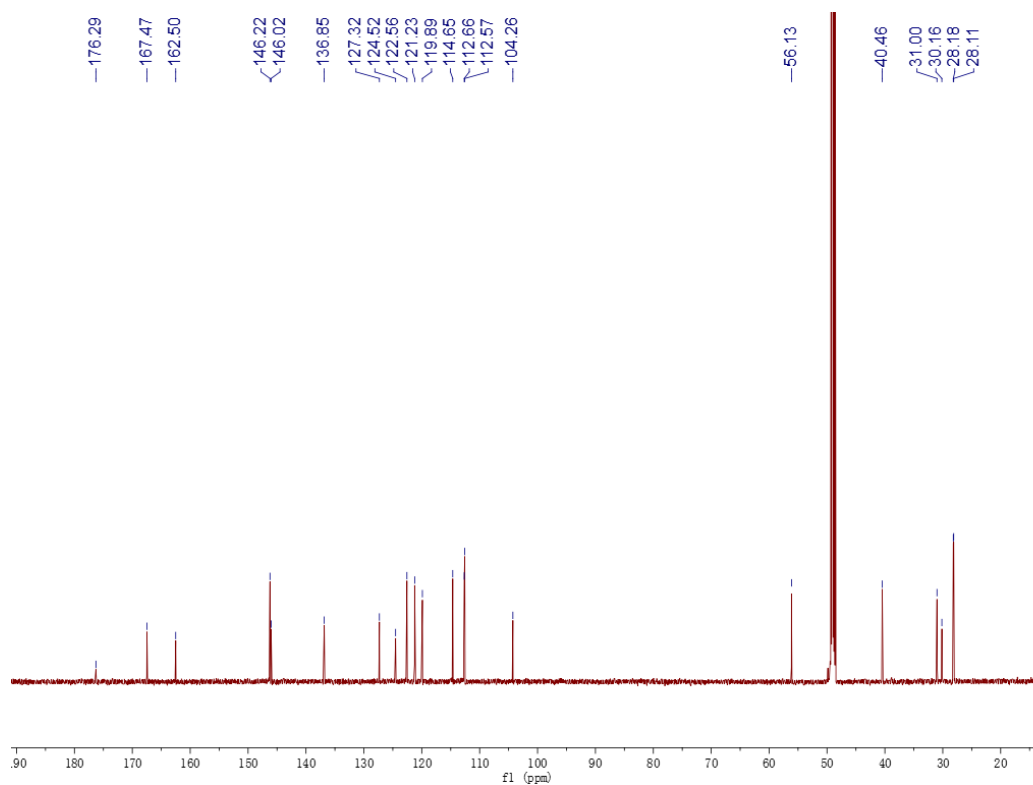

Figure S10 <sup>13</sup>C NMR spectrum (600 MHz, methanol-*d*<sub>4</sub>) of compound **2**



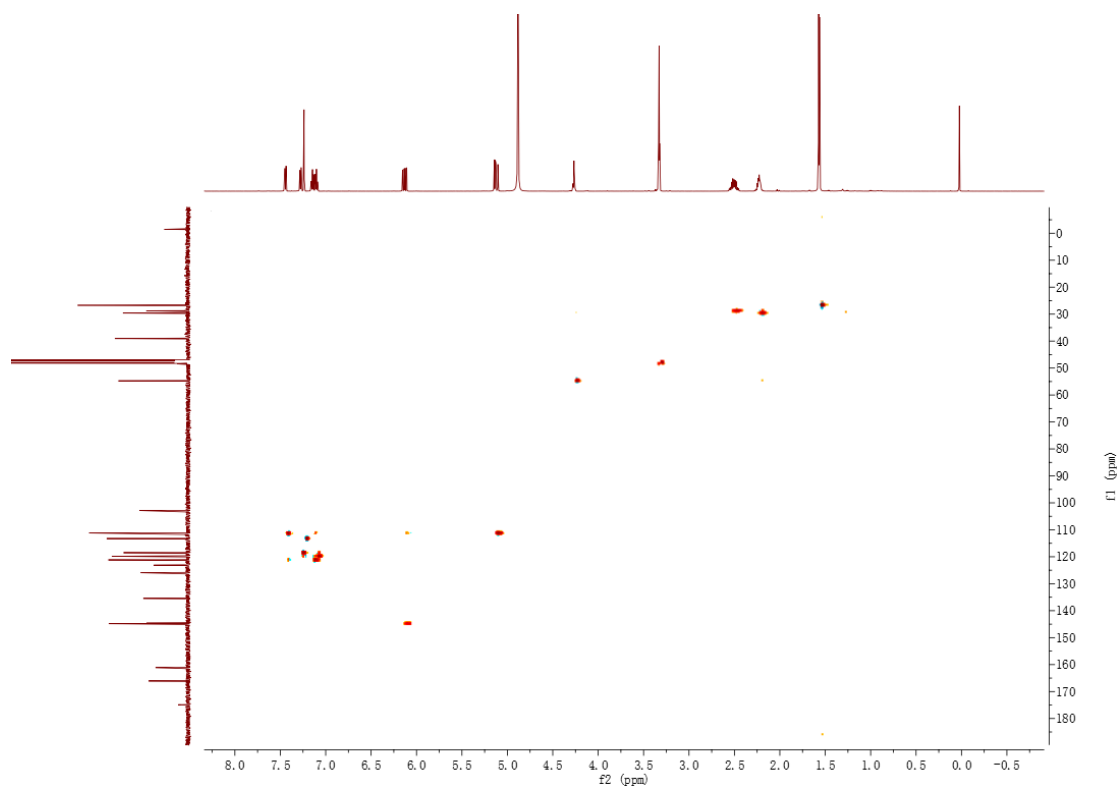

Figure S11 HMQC spectrum (600 MHz, methanol- $d_4$ ) of compound **2**

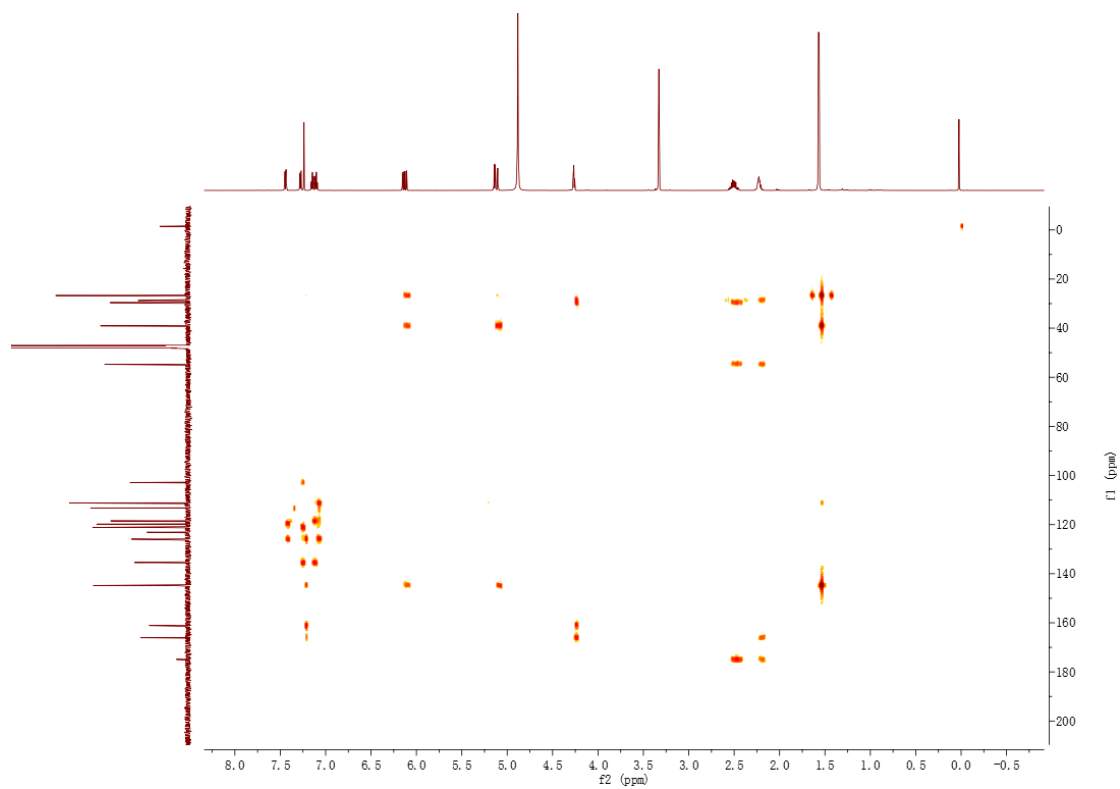

Figure S12 HMBC spectrum (600 MHz, methanol- $d_4$ ) of compound **2**

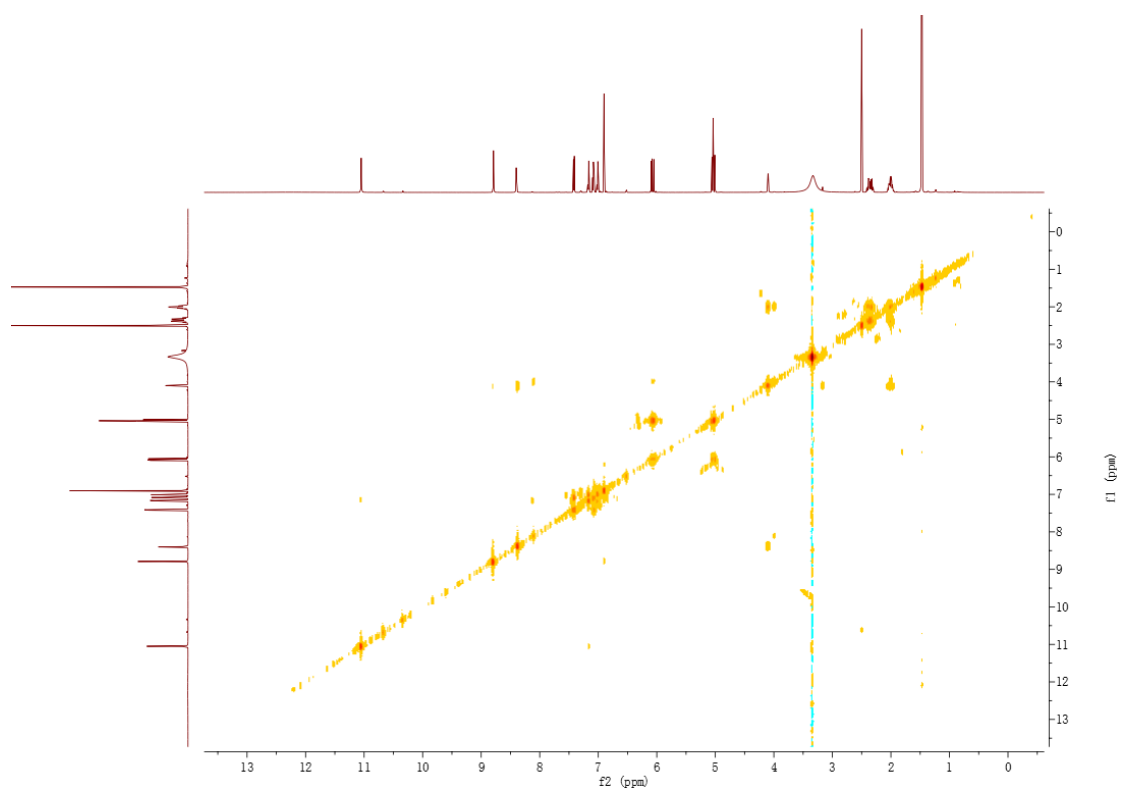

Figure S13  $^1\text{H}$ - $^1\text{H}$  COSY spectrum (600 MHz,  $\text{DMSO-}d_4$ ) of compound **2**

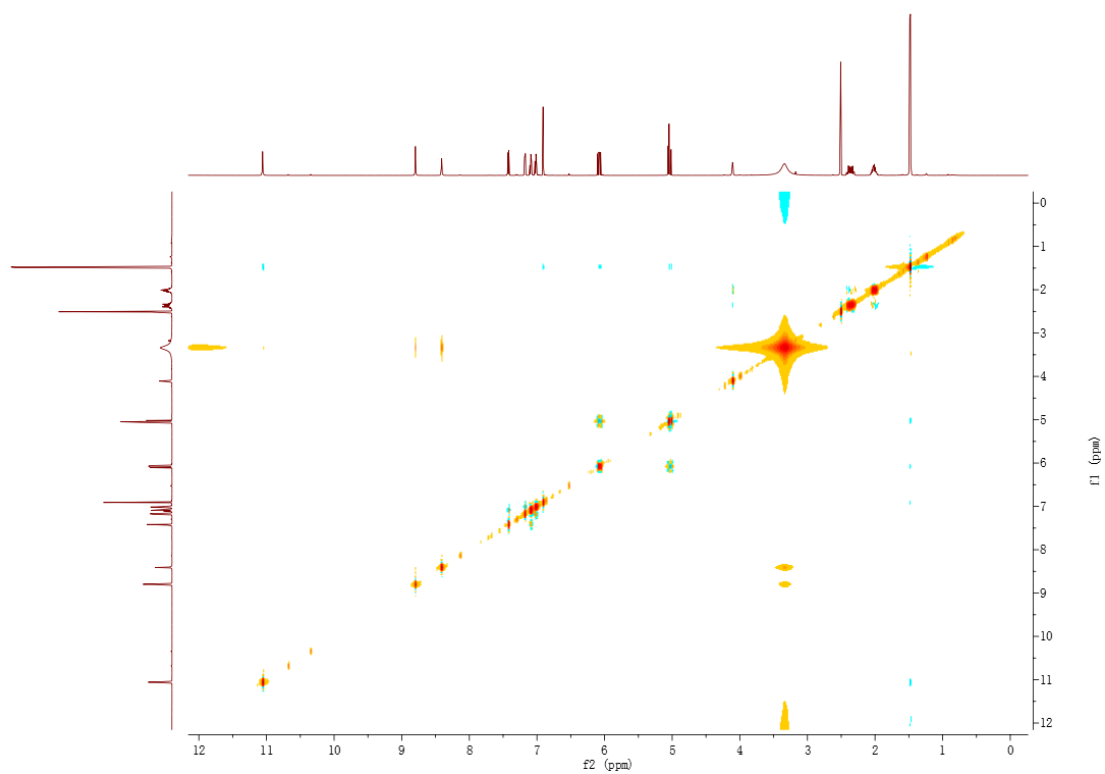

Figure S14 NOESY spectrum (600 MHz,  $\text{DMSO-}d_6$ ) of compound **2**

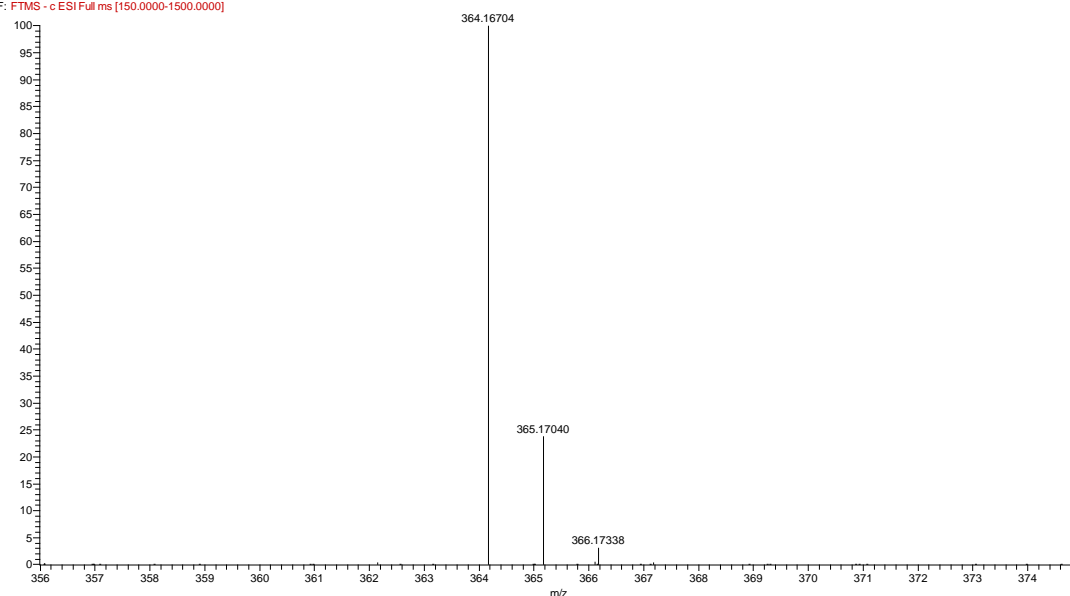

SPECTRUM - simulation :

| m/z       | Theo. Mass | Delta (ppm) | RDB equiv. | Composition                                                   |
|-----------|------------|-------------|------------|---------------------------------------------------------------|
| 364.16704 | 364.16666  | 1.03        | 12.5       | C <sub>21</sub> H <sub>22</sub> O <sub>3</sub> N <sub>3</sub> |

Figure S15 HRESIMS of compound **3**

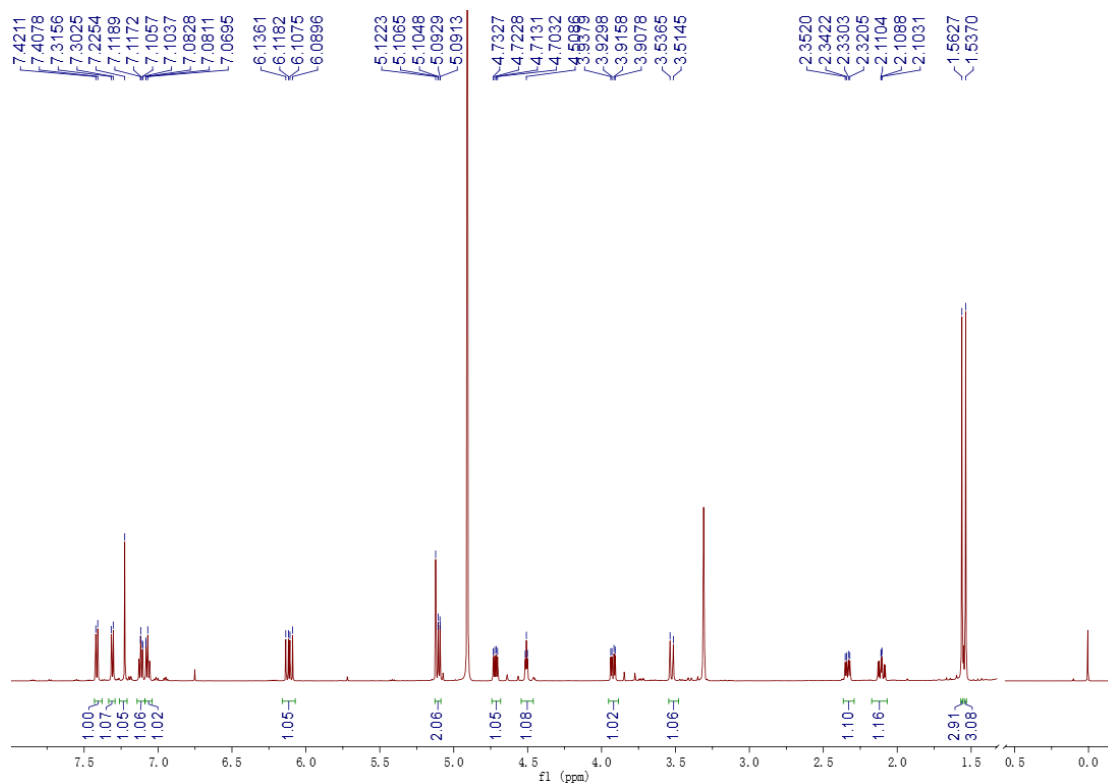

Figure S16 <sup>1</sup>H NMR spectrum (600 MHz, methanol-*d*<sub>4</sub>) of compound **3**

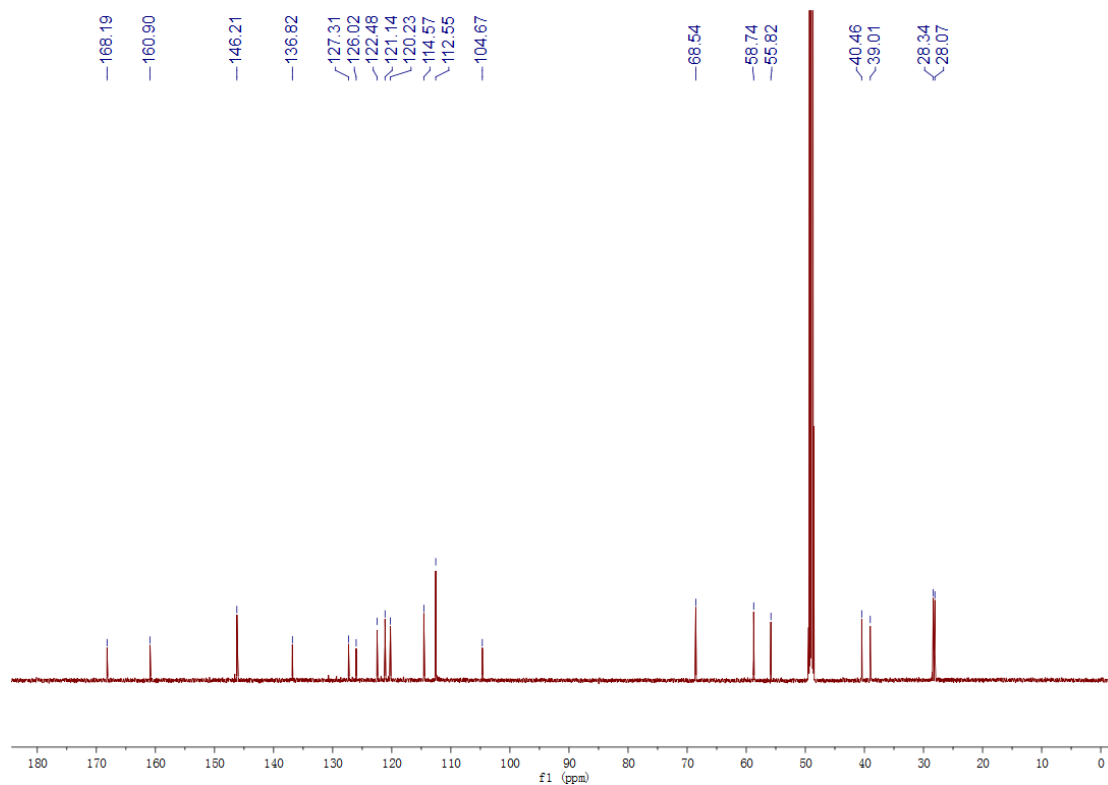

Figure S17  $^{13}\text{C}$  NMR spectrum (600 MHz, methanol- $d_4$ ) of compound **3**

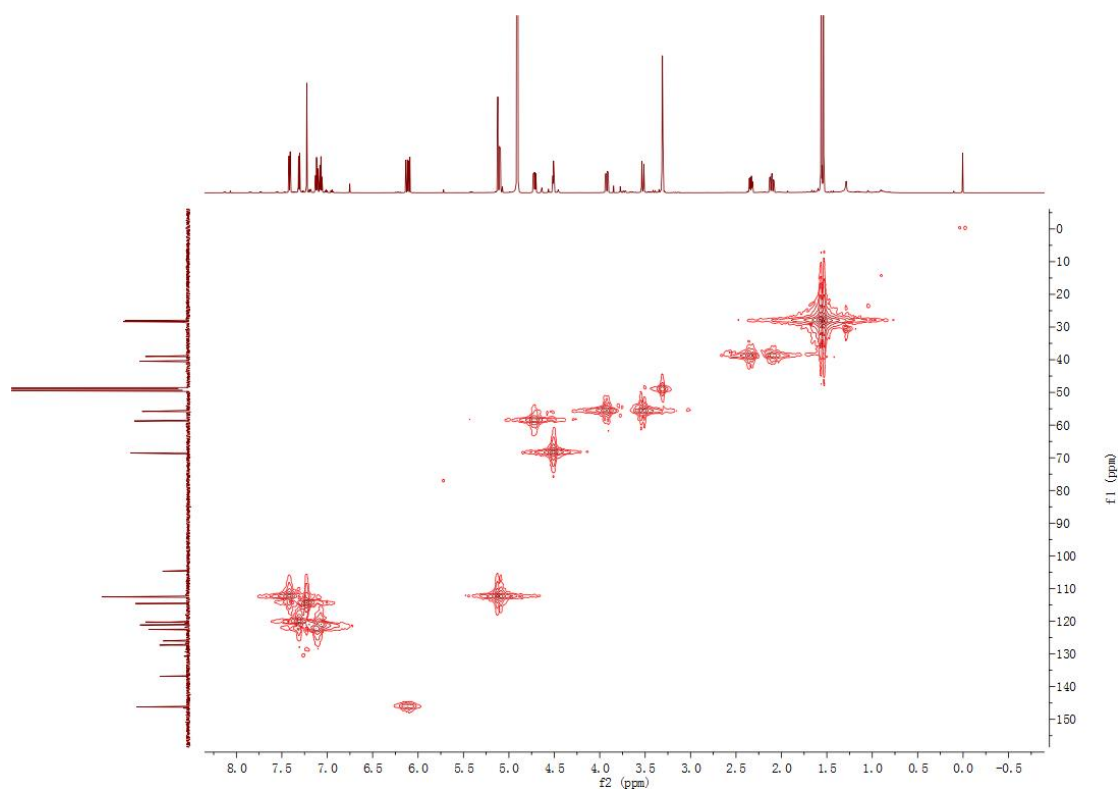

Figure.S18 HMQC spectrum (600 MHz, methanol- $d_4$ ) of compound **3**

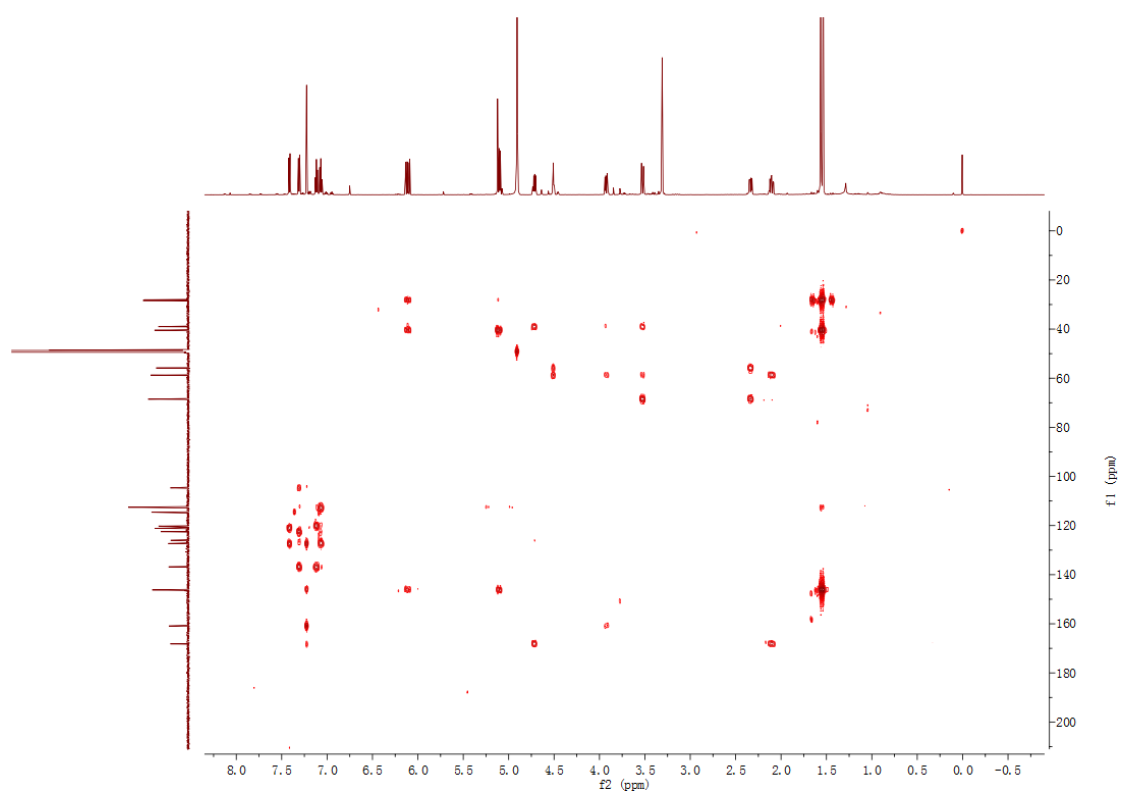

Figure S19 HMBC spectrum (600 MHz, methanol- $d_4$ ) of compound **3**

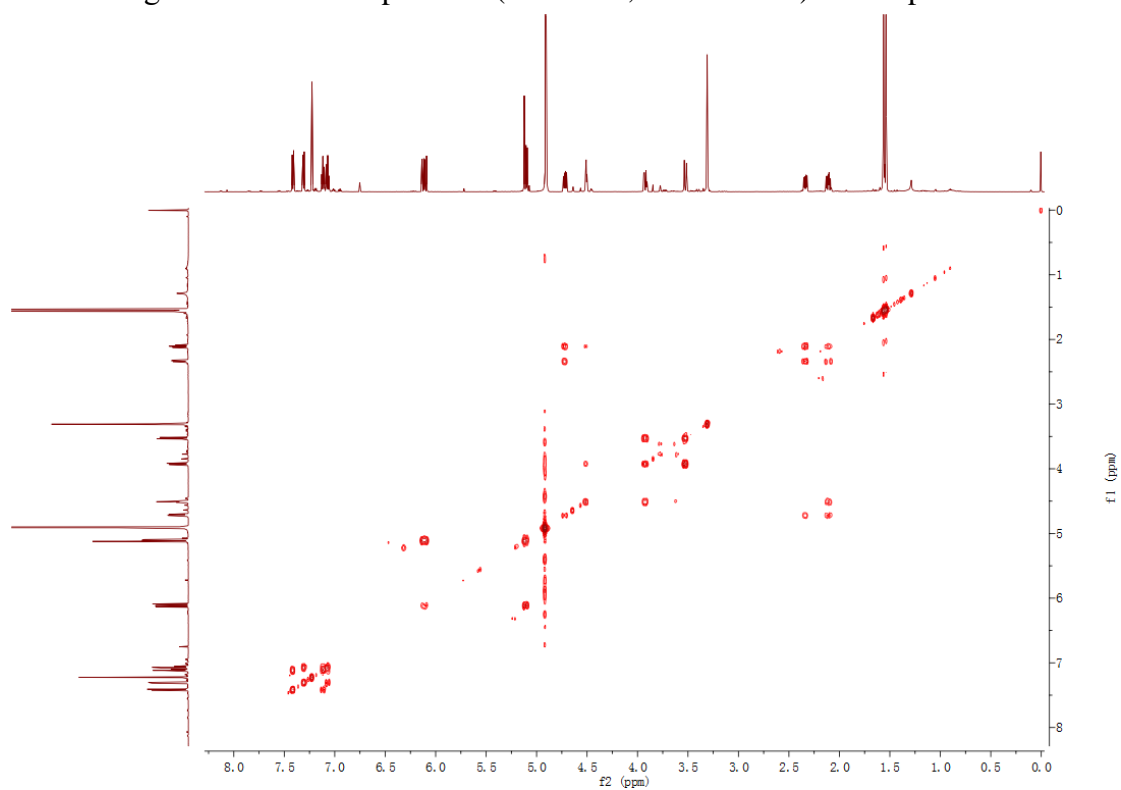

Figure S20  $^1\text{H}$ - $^1\text{H}$  COSY spectrum (600 MHz, methanol- $d_4$ ) of compound **3**

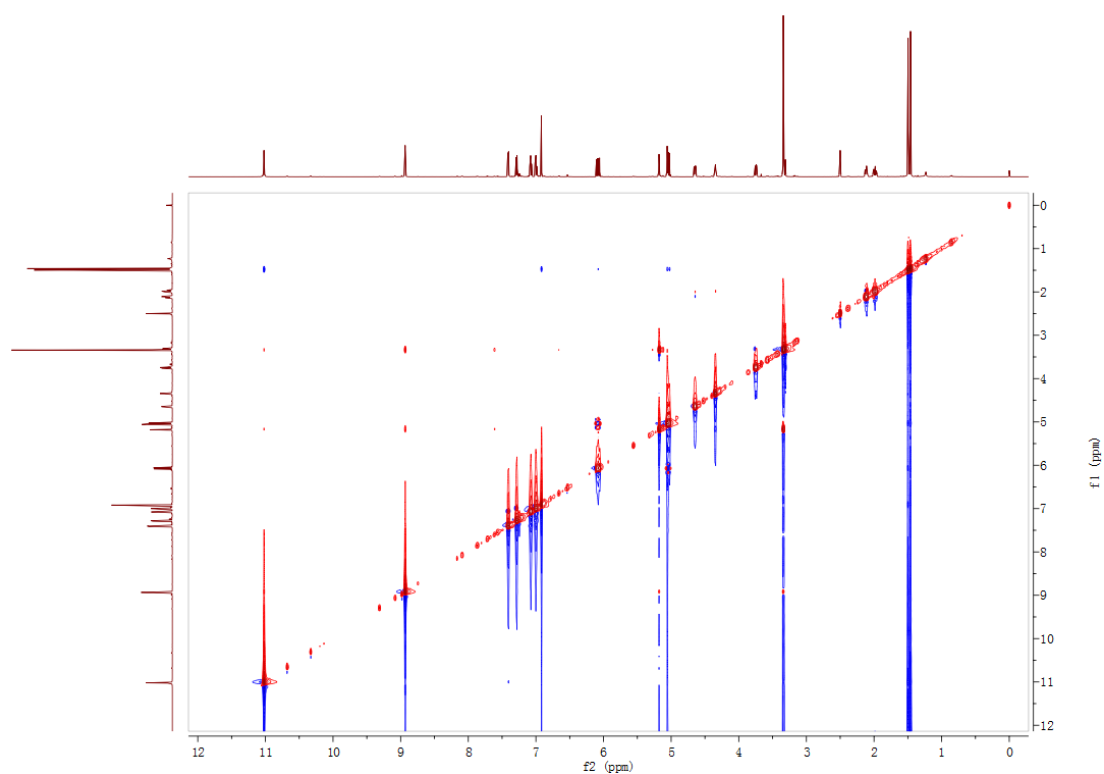

Figure S21 NOESY spectrum (600 MHz, DMSO- $d_6$ ) of compound **3**

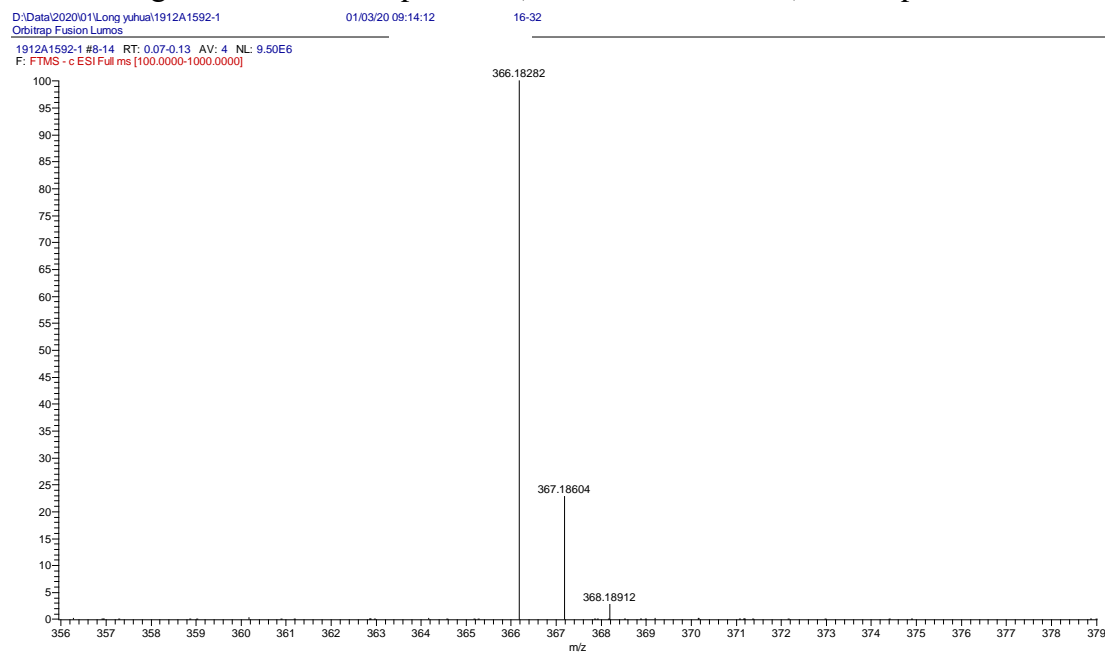

SPECTRUM - simulation :

| m/z       | Theo. Mass | Delta (ppm) | RDB equiv. | Composition                                                   |
|-----------|------------|-------------|------------|---------------------------------------------------------------|
| 366.18282 | 366.18231  | 1.38        | 11.5       | C <sub>21</sub> H <sub>24</sub> O <sub>3</sub> N <sub>3</sub> |

Figure S22 HRESIMS of compound **4**

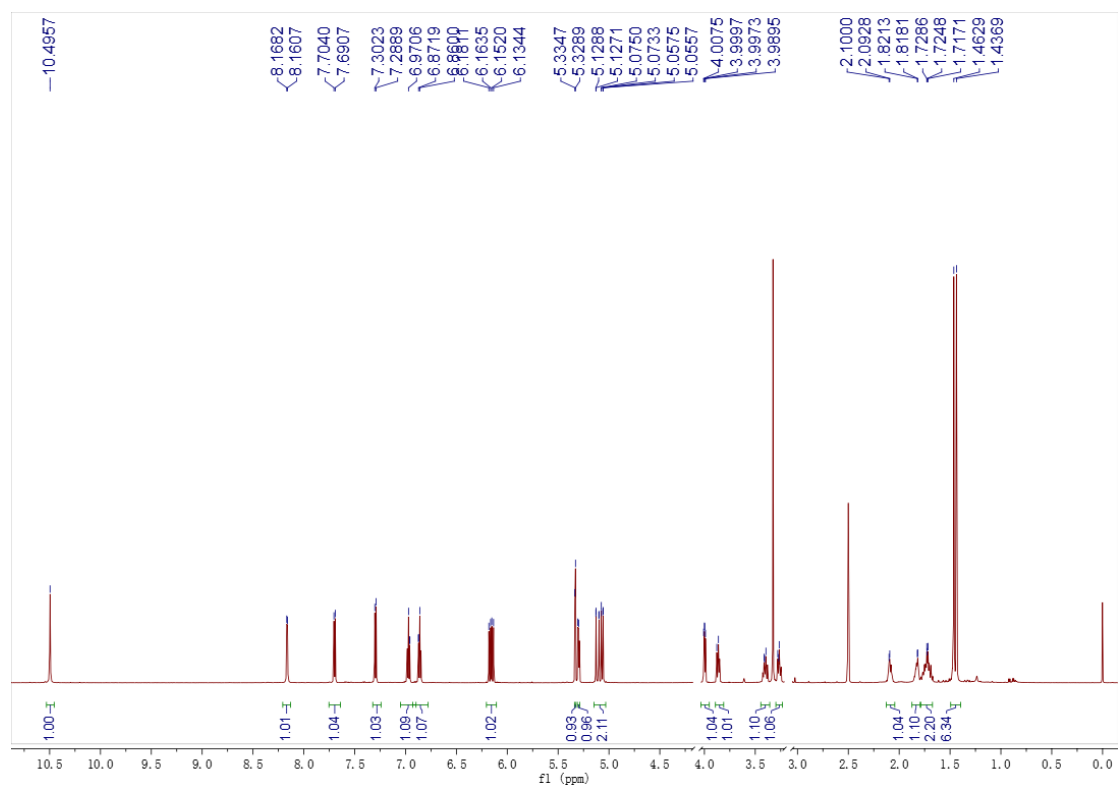

Figure S23 <sup>1</sup>H NMR spectrum (600 MHz, DMSO-*d*<sub>6</sub>) of compound **4**

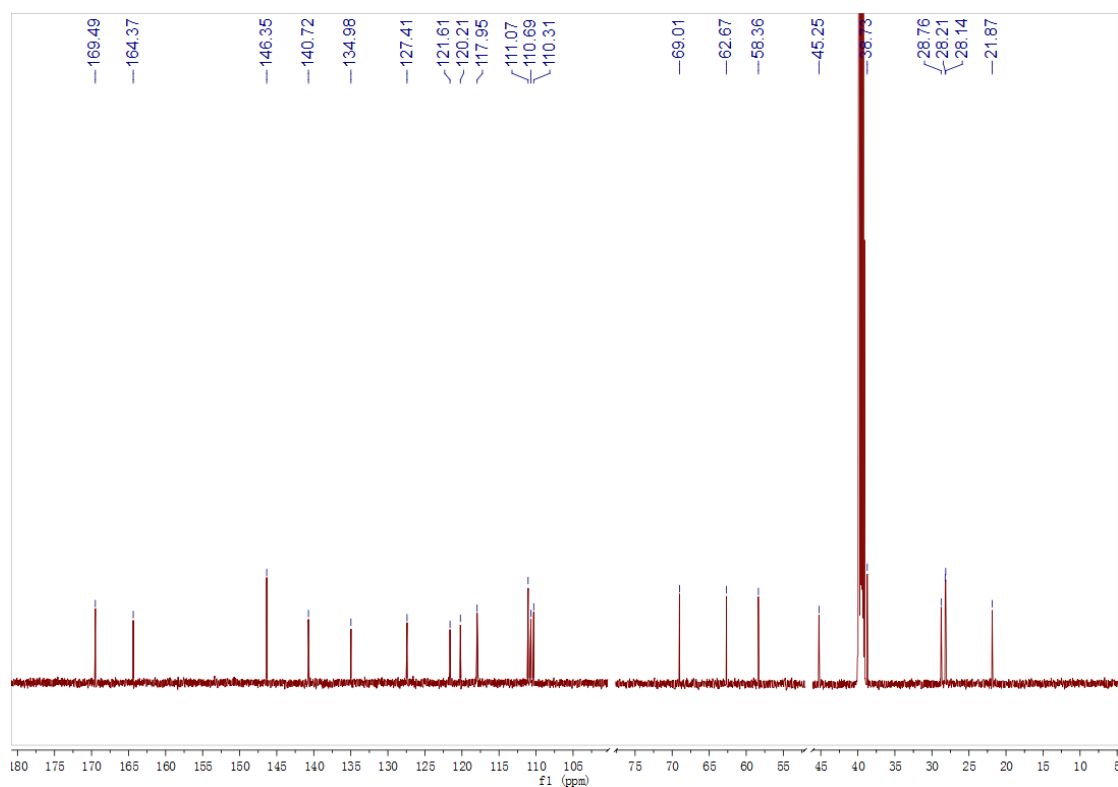

Figure S24 <sup>13</sup>C NMR spectrum (600 MHz, DMSO-*d*<sub>6</sub>) of compound **4**

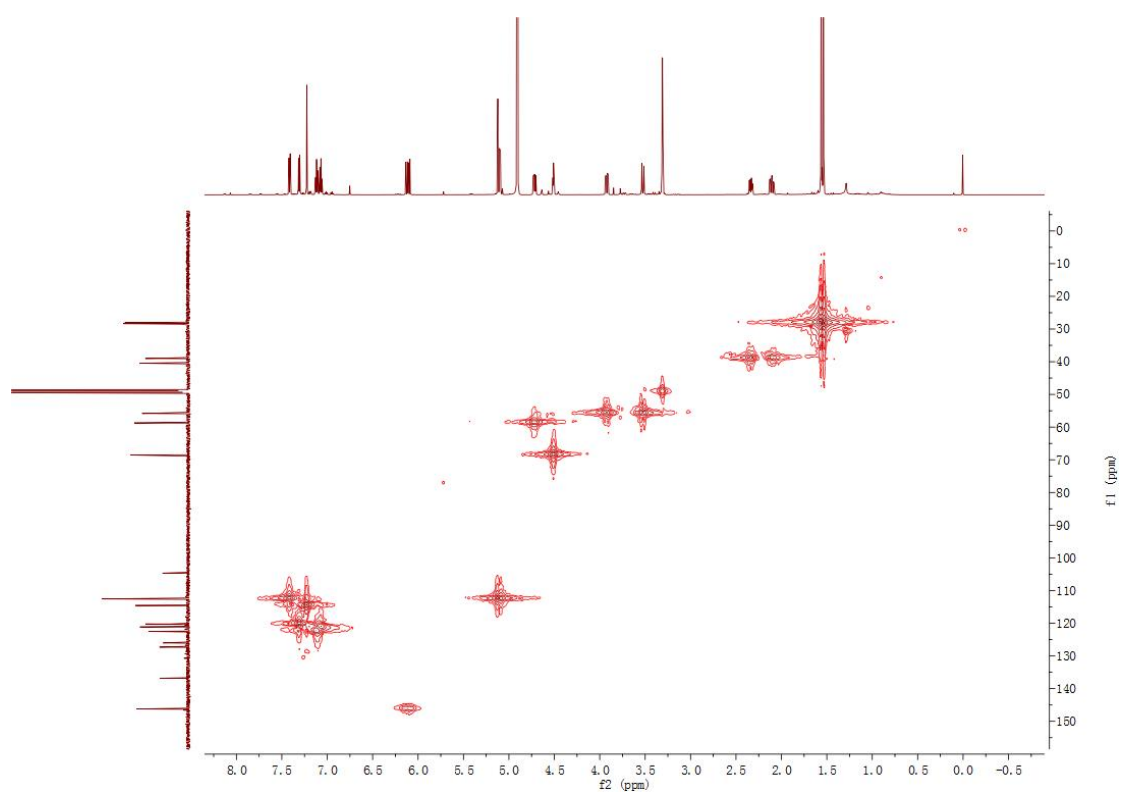

Figure S25 HMQC spectrum (600 MHz, DMSO- $d_6$ ) of compound **4**

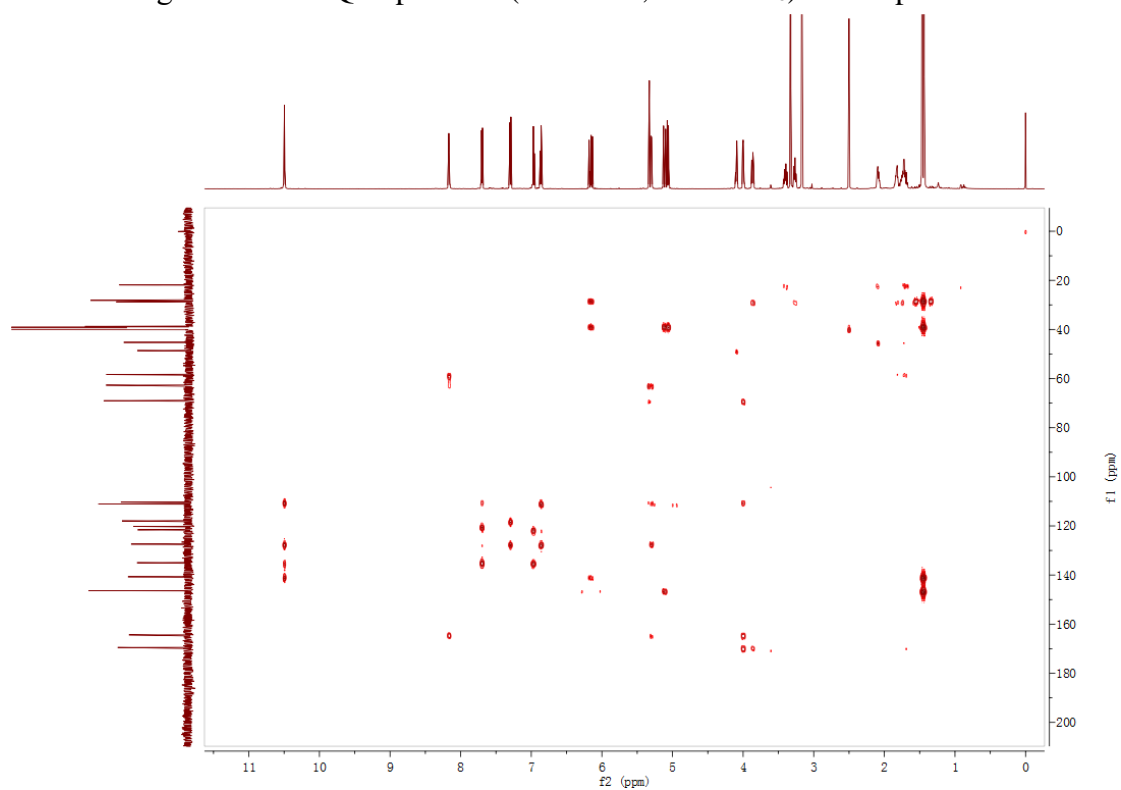

Figure S26 HMBC spectrum (600 MHz, DMSO- $d_6$ ) of compound **4**



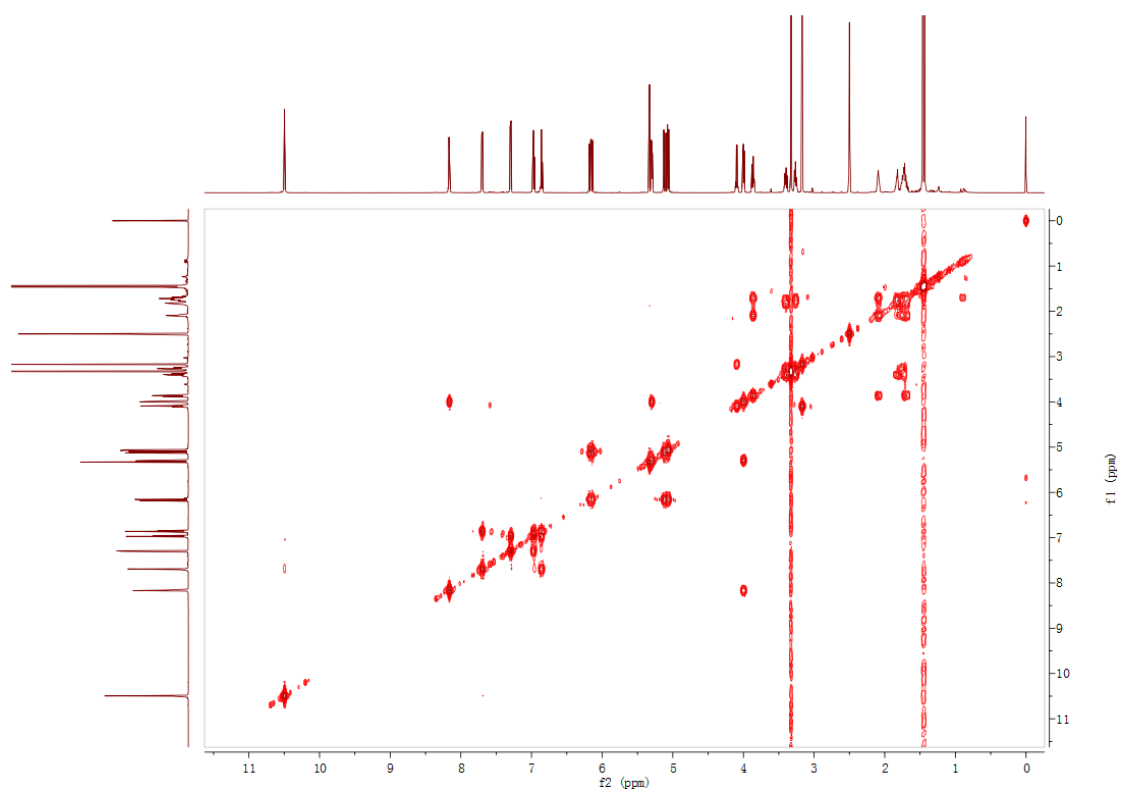

Figure S27  $^1\text{H}$ - $^1\text{H}$  COSY spectrum (600 MHz,  $\text{DMSO}-d_6$ ) of compound **4**

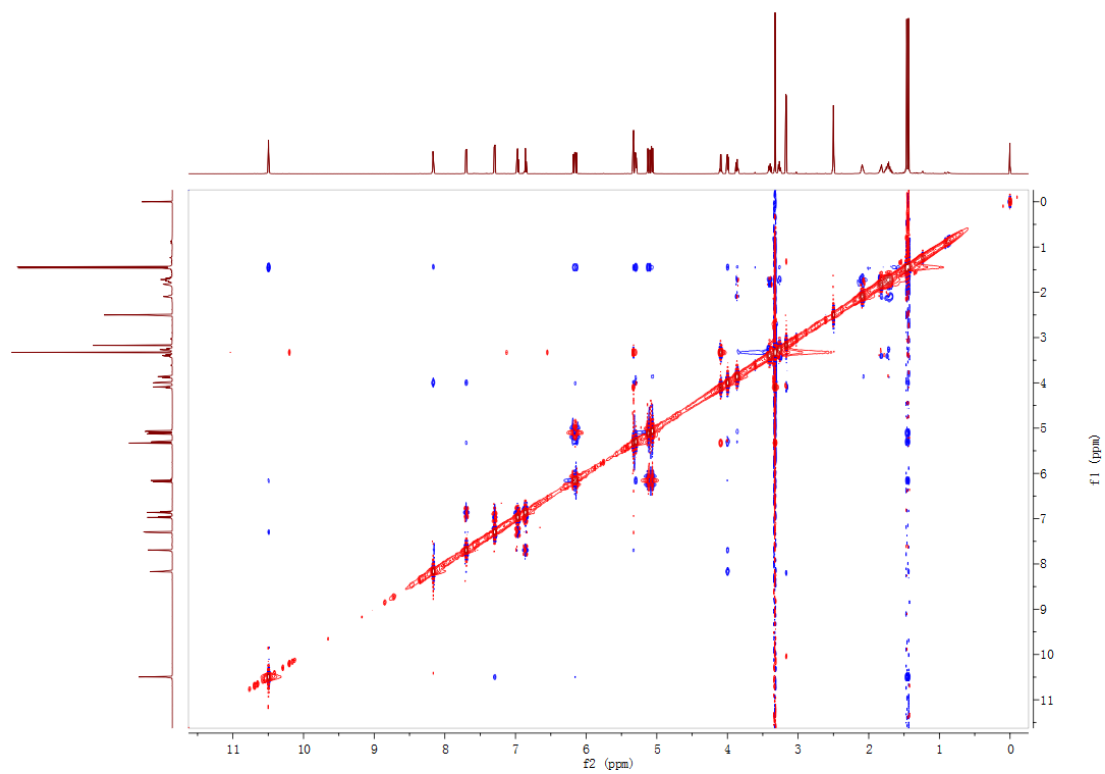

Figure S28 NOESY spectrum (600 MHz,  $\text{DMSO}-d_6$ ) of compound **4**

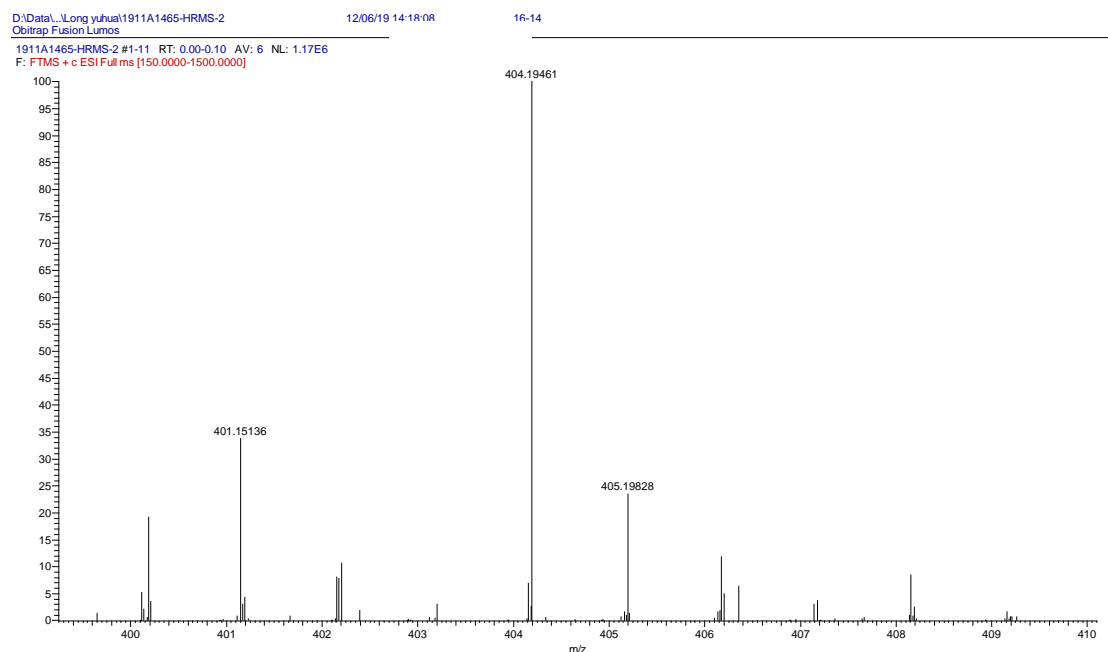

SPECTRUM - simulation :

| m/z       | Theo. Mass | Delta (ppm) | RDB equiv. | Composition                                                      |
|-----------|------------|-------------|------------|------------------------------------------------------------------|
| 404.19461 | 404.19446  | 0.36        | 10.5       | C <sub>22</sub> H <sub>27</sub> O <sub>3</sub> N <sub>3</sub> Na |

Figure S29 HRESIMS of compound **5**

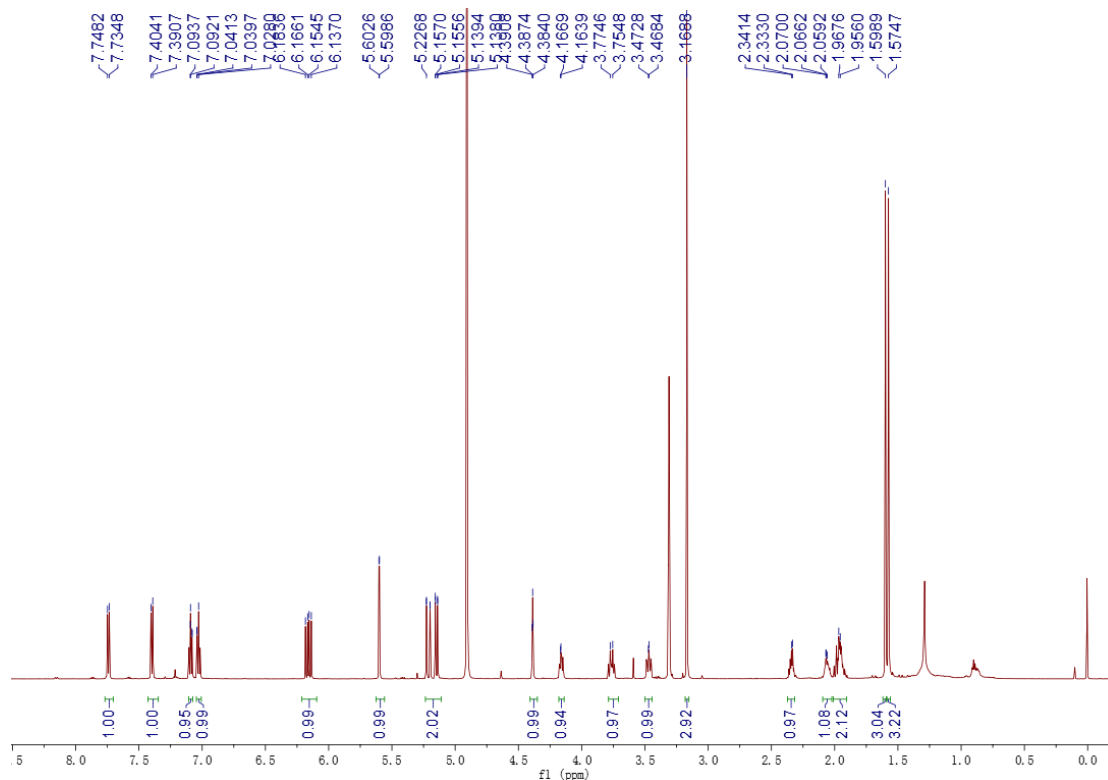

Figure S30 <sup>1</sup>H NMR spectrum (600 MHz, methanol-*d*<sub>4</sub>) of compound **5**

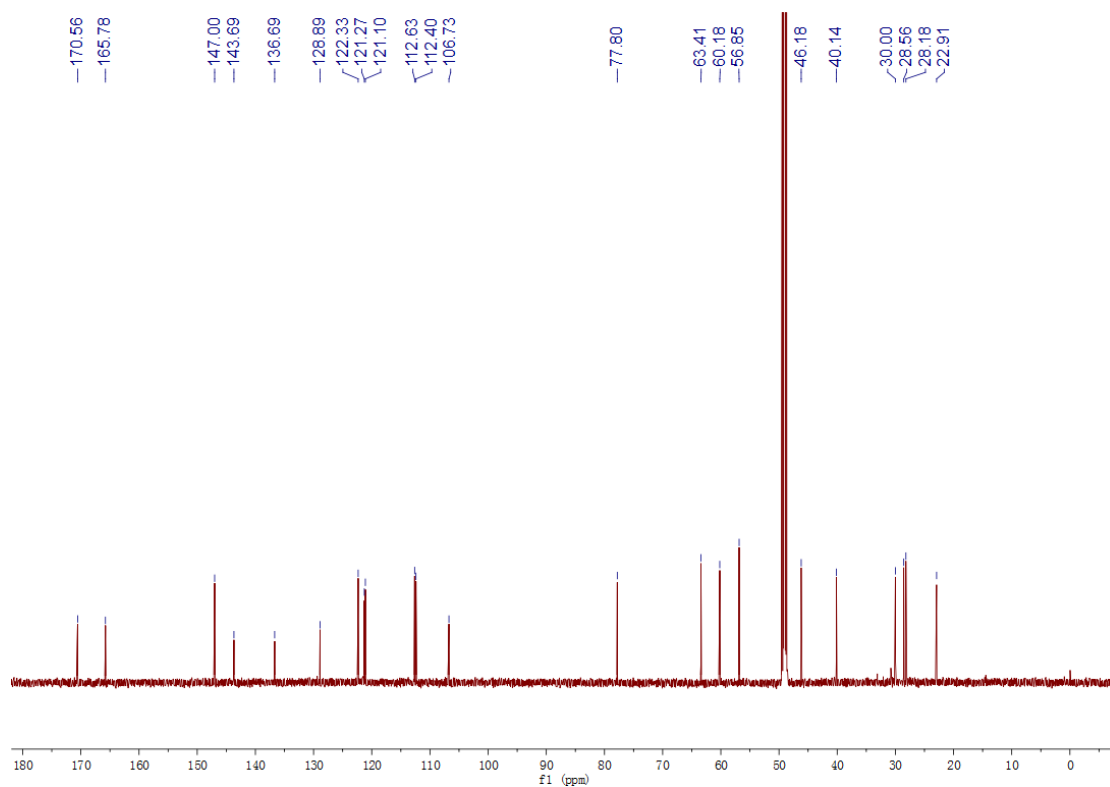

Figure S31  $^{13}\text{C}$  NMR spectrum (600 MHz, methanol- $d_4$ ) of compound **5**

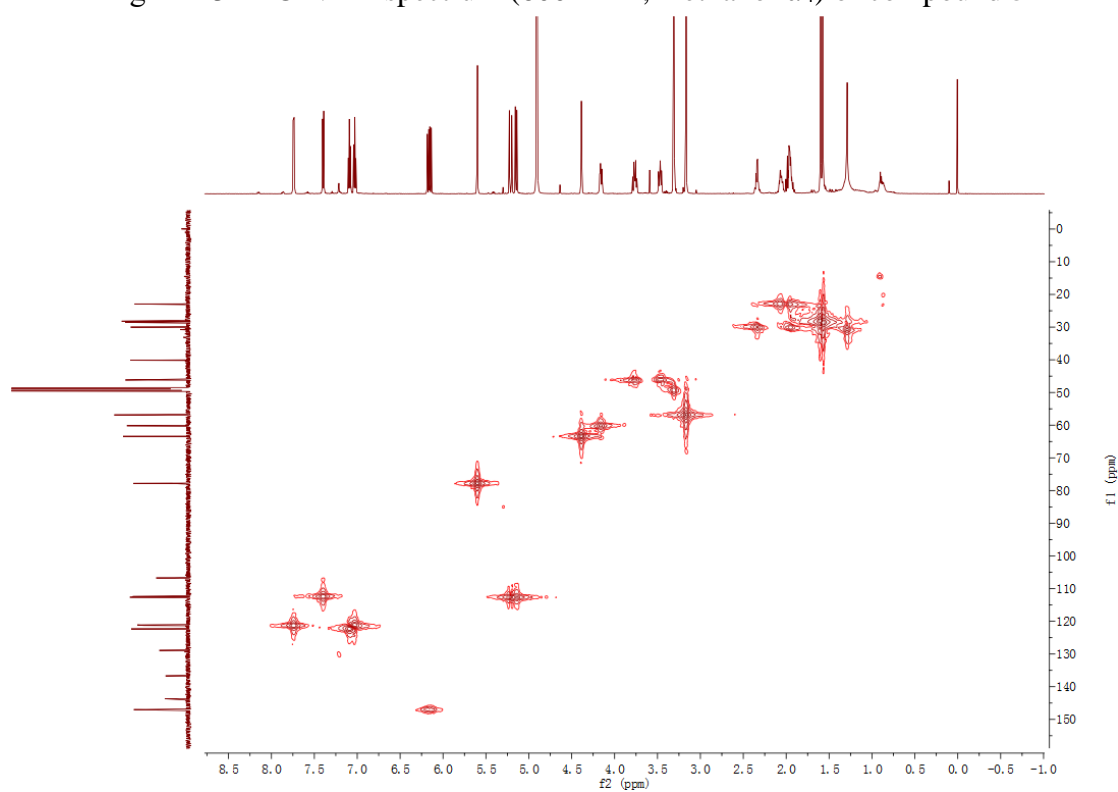

Figure S32 HMQC spectrum (600 MHz, methanol- $d_4$ ) of compound **5**

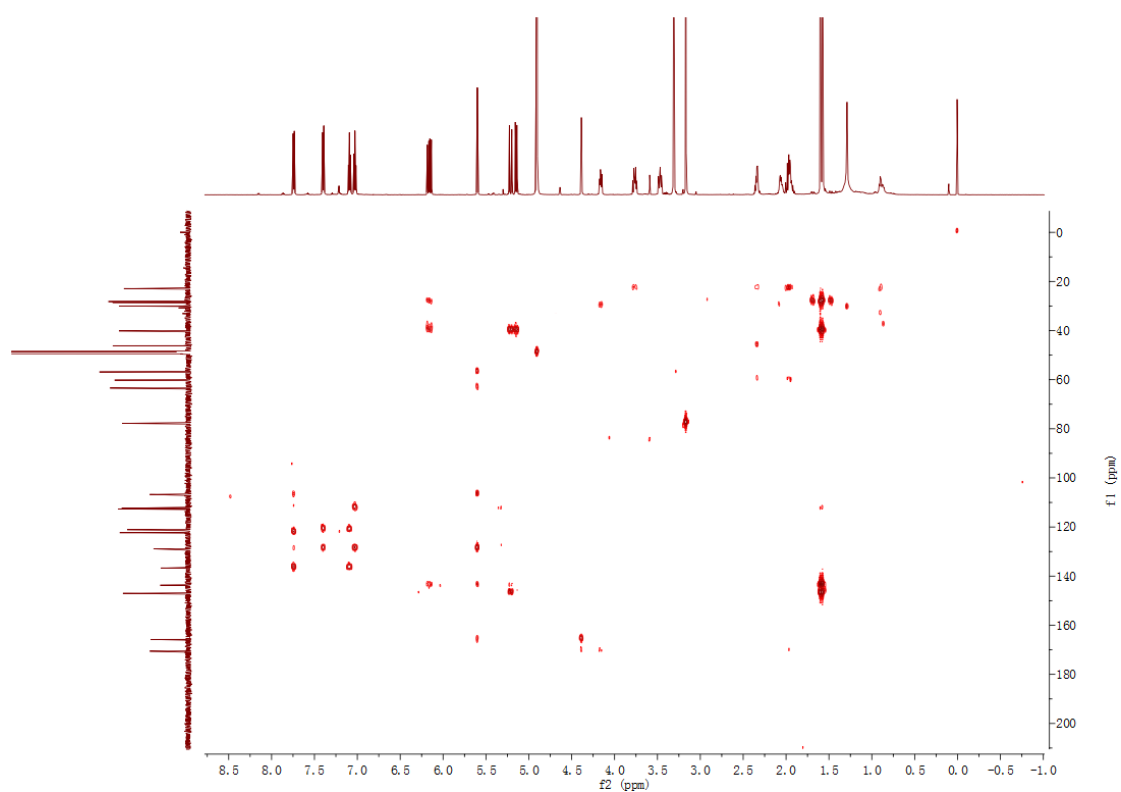

Figure S33 HMBC spectrum (600 MHz, methanol- $d_4$ ) of compound **5**

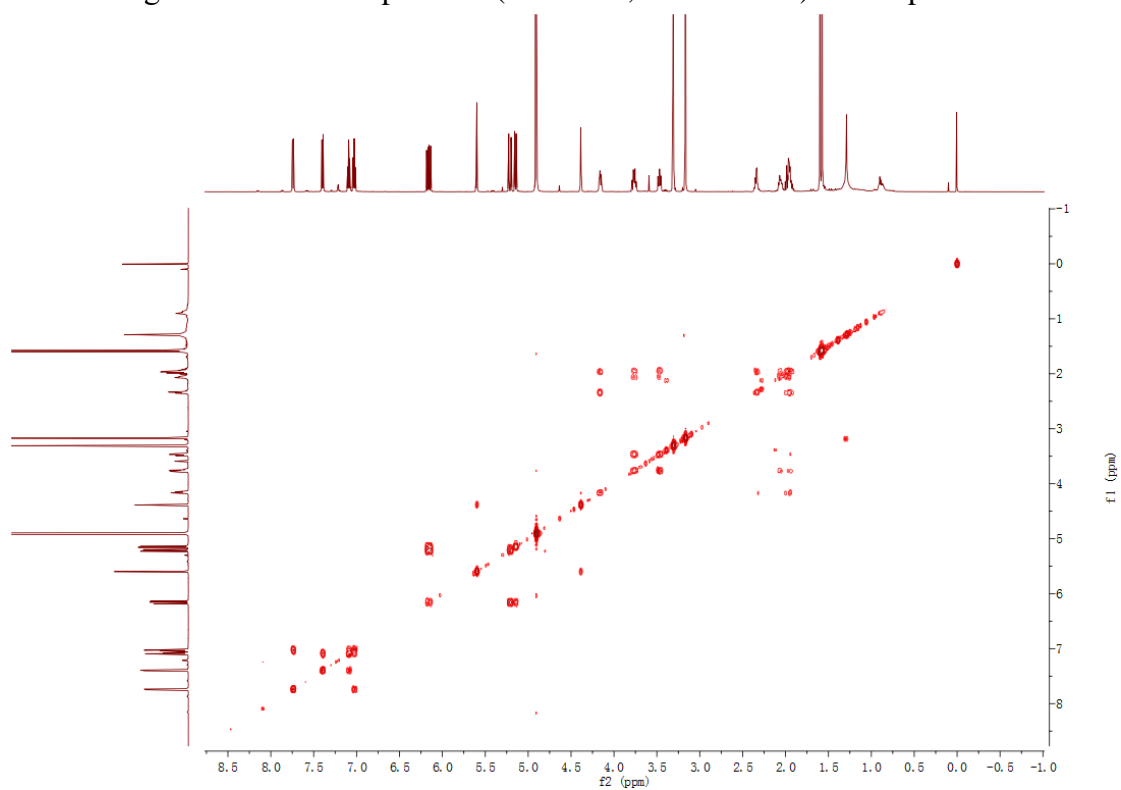

Figure S34  $^1\text{H}$ - $^1\text{H}$  COSY spectrum (600 MHz, methanol- $d_4$ ) of compound **5**

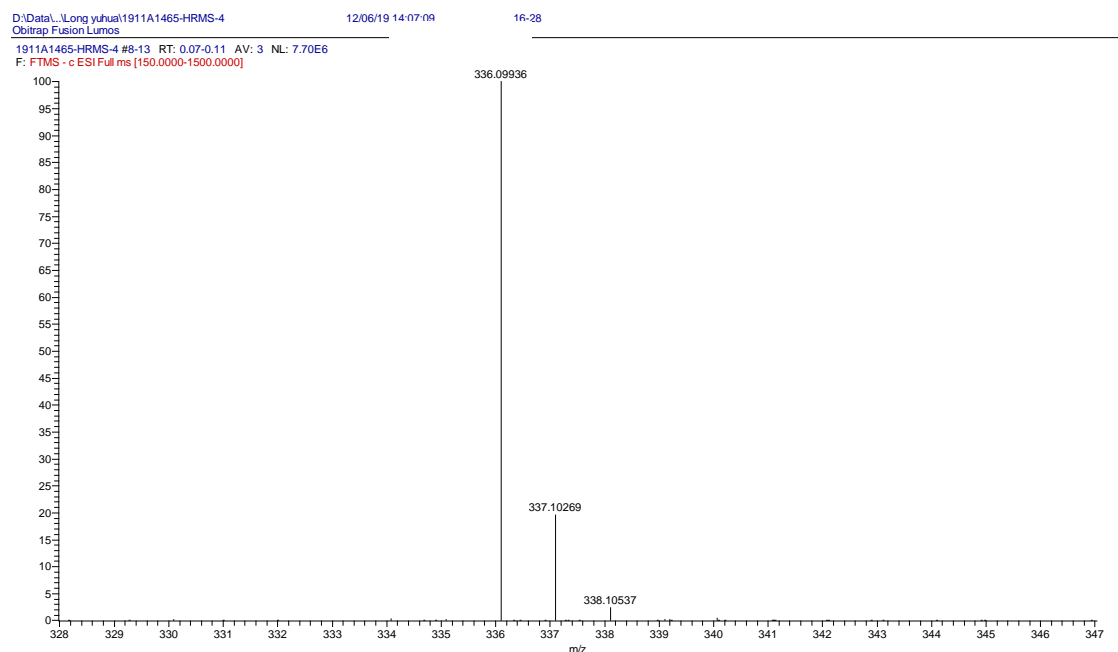

SPECTRUM - simulation :

| m/z       | Theo. Mass | Delta (ppm) | RDB equiv. | Composition                                                   |
|-----------|------------|-------------|------------|---------------------------------------------------------------|
| 336.09936 | 336.09898  | 1.13        | 13.5       | C <sub>18</sub> H <sub>14</sub> O <sub>4</sub> N <sub>3</sub> |

Figure S35 HRESIMS of compound **6**

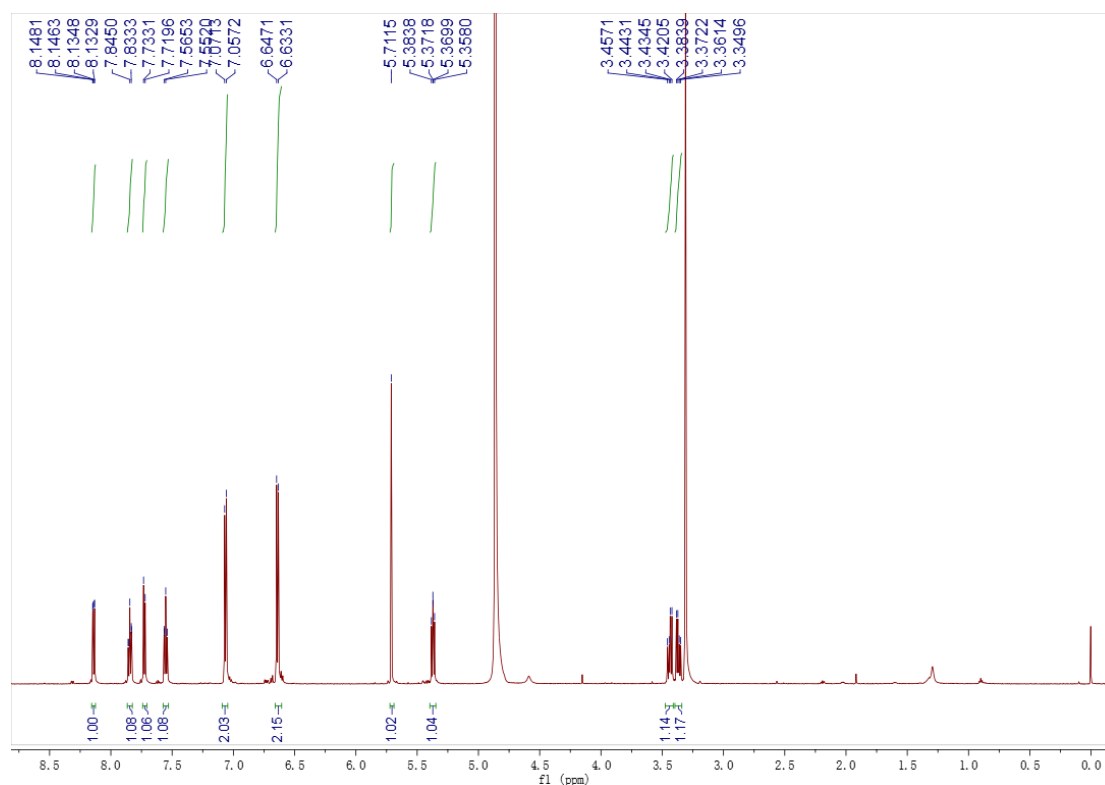

Figure S36 <sup>1</sup>H NMR spectrum (600 MHz, methanol-*d*<sub>4</sub>) of compound **6**

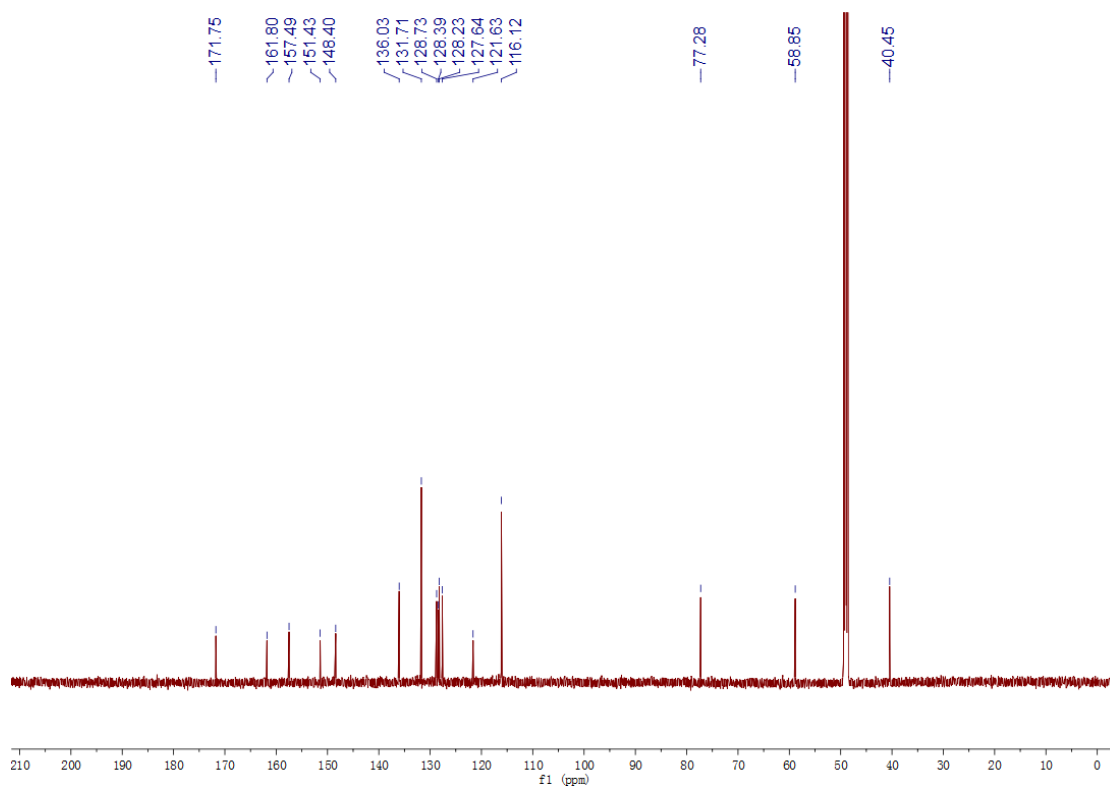

Figure S37  $^{13}\text{C}$  NMR spectrum (600 MHz, methanol- $d_4$ ) of compound **6**

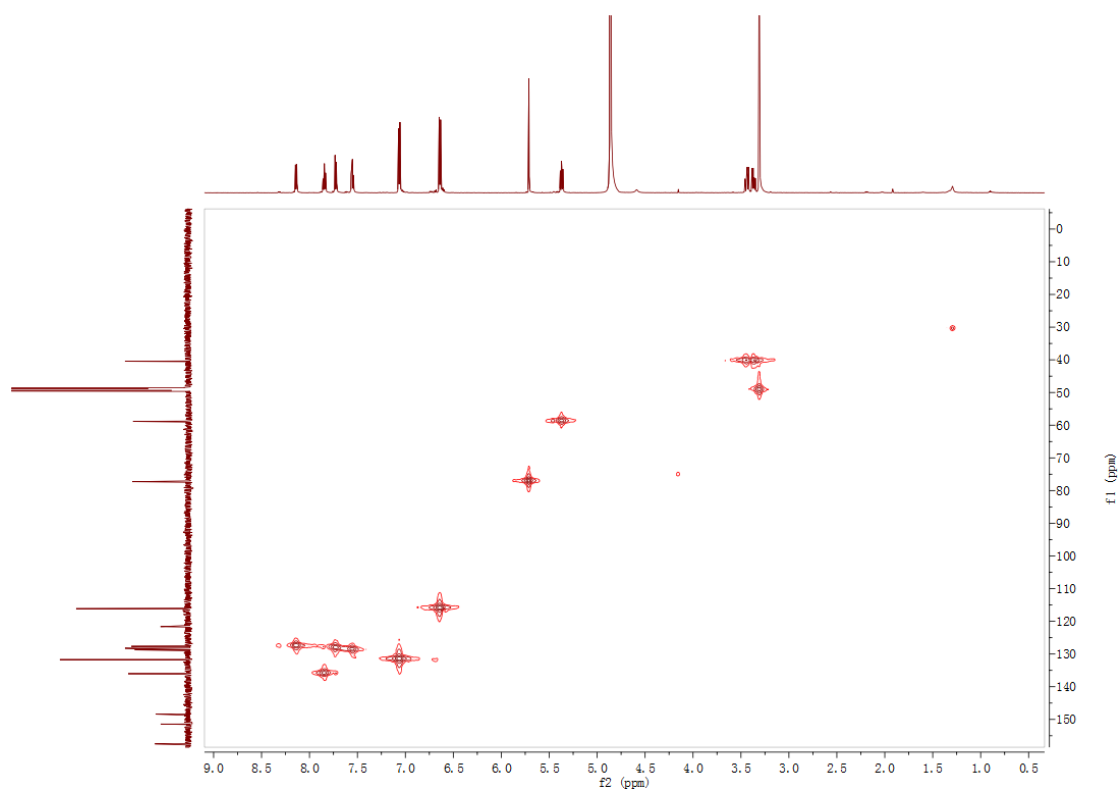

Figure S38 HMQC spectrum (600 MHz, methanol- $d_4$ ) of compound **6**

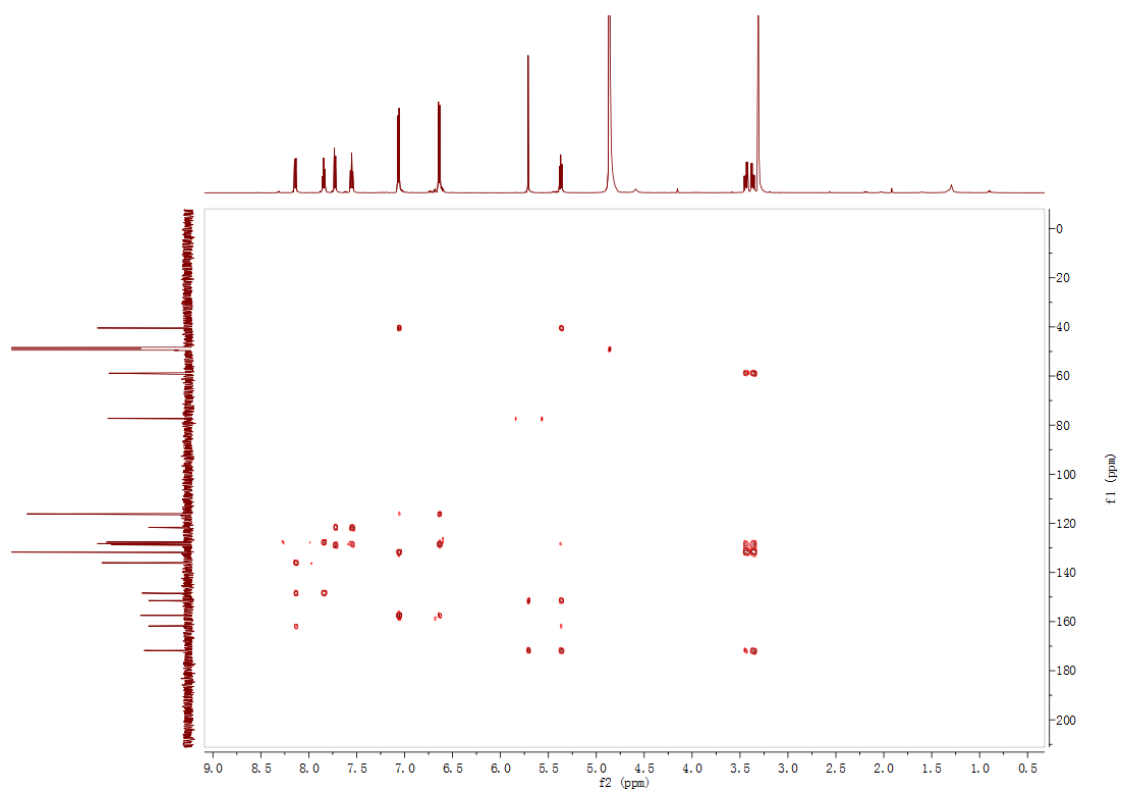

Figure S39 HMBC spectrum (600 MHz, methanol- $d_4$ ) of compound **6**

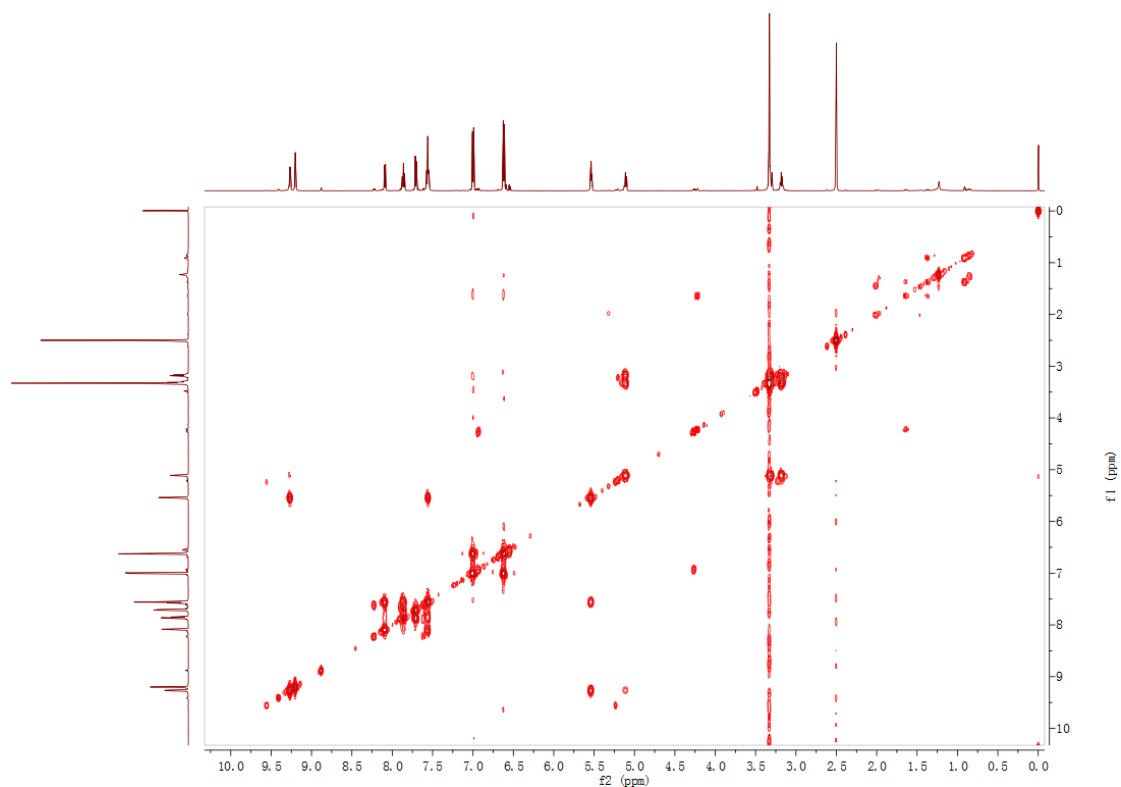

Figure S40  $^1\text{H}$ - $^1\text{H}$  COSY spectrum (600 MHz, methanol- $d_4$ ) of compound **6**

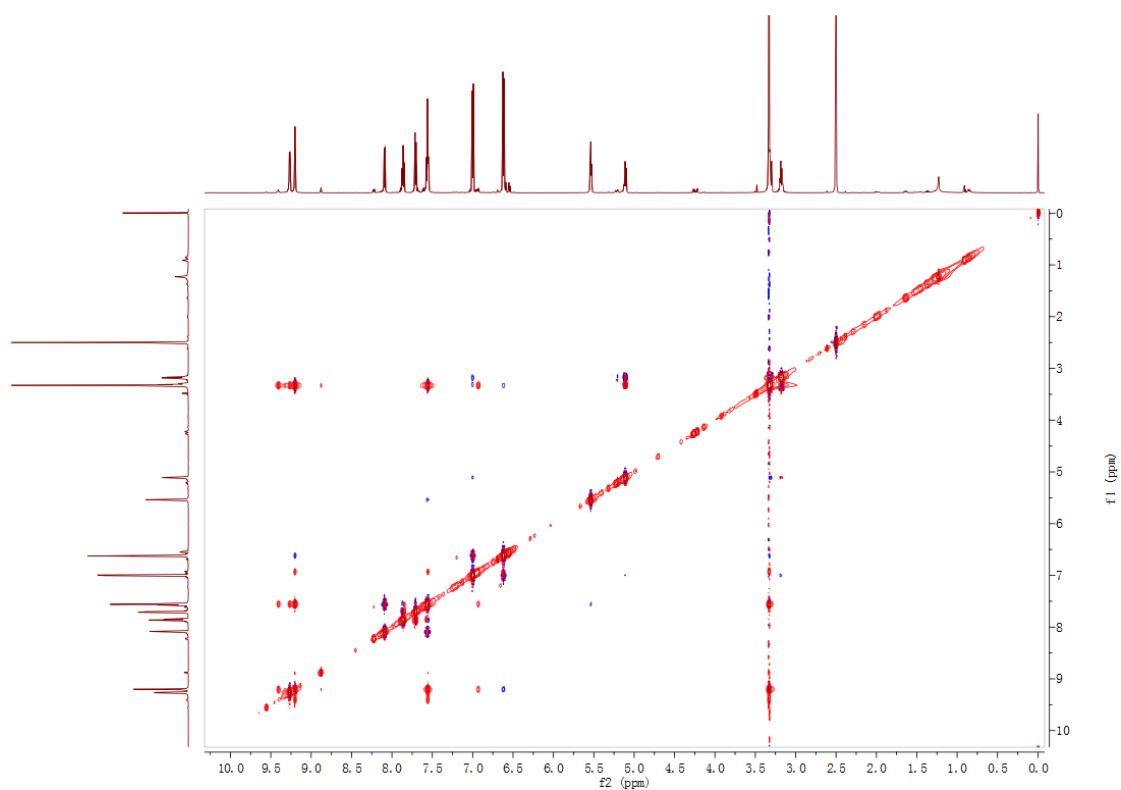

Figure S41 NOESY spectrum (600 MHz, DMSO- $d_6$ ) of compound **6**

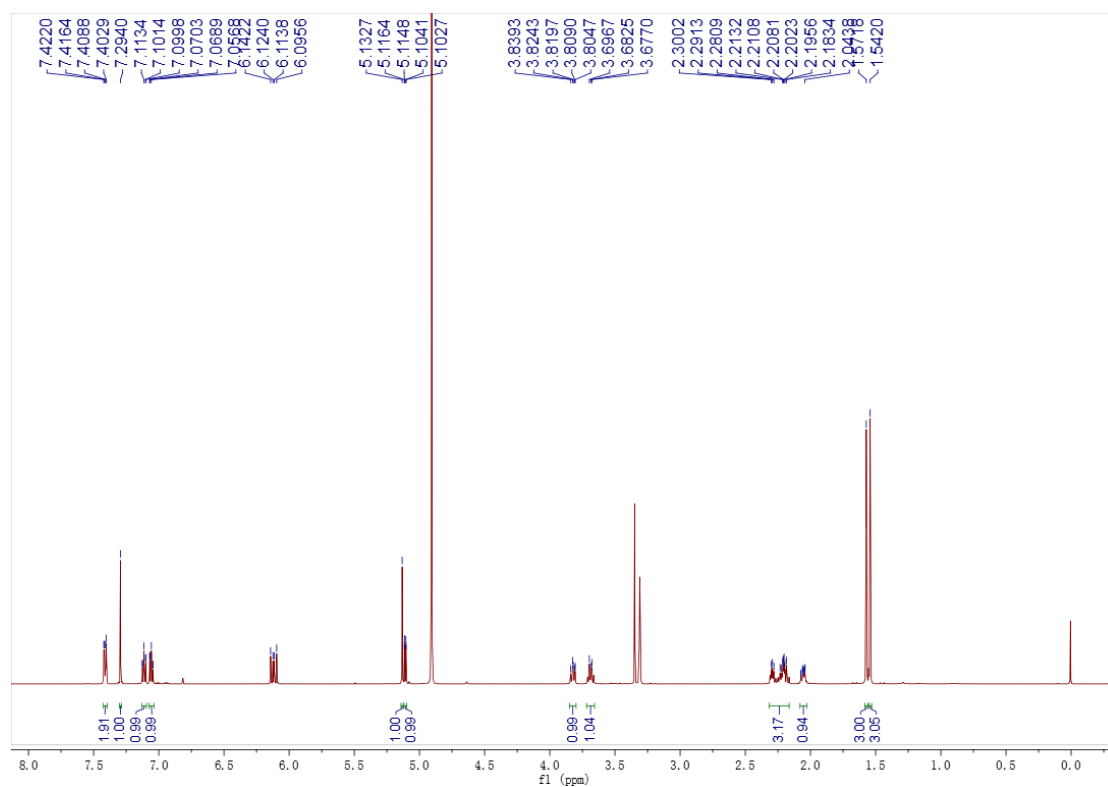

Figure S42  $^1\text{H}$  NMR spectrum (600 MHz, methanol- $d_4$ ) of compound **7**



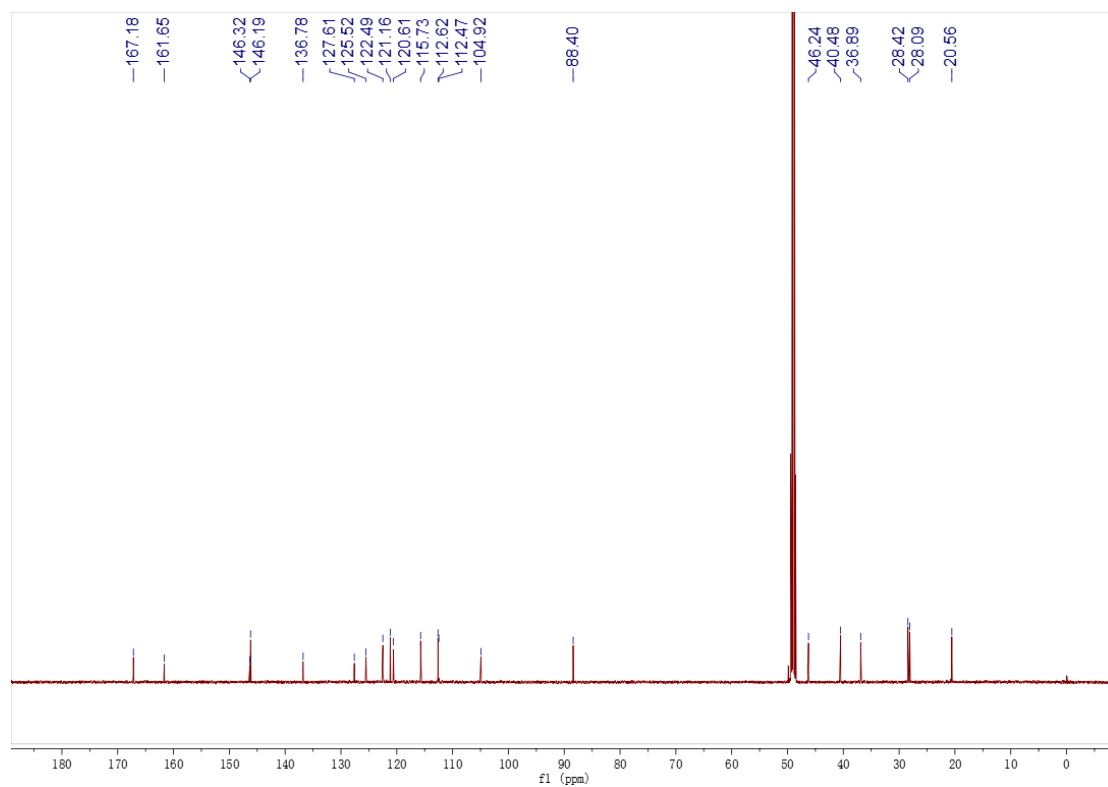

Figure S43  $^{13}\text{C}$  NMR spectrum (600 MHz, methanol- $d_4$ ) of compound **7**

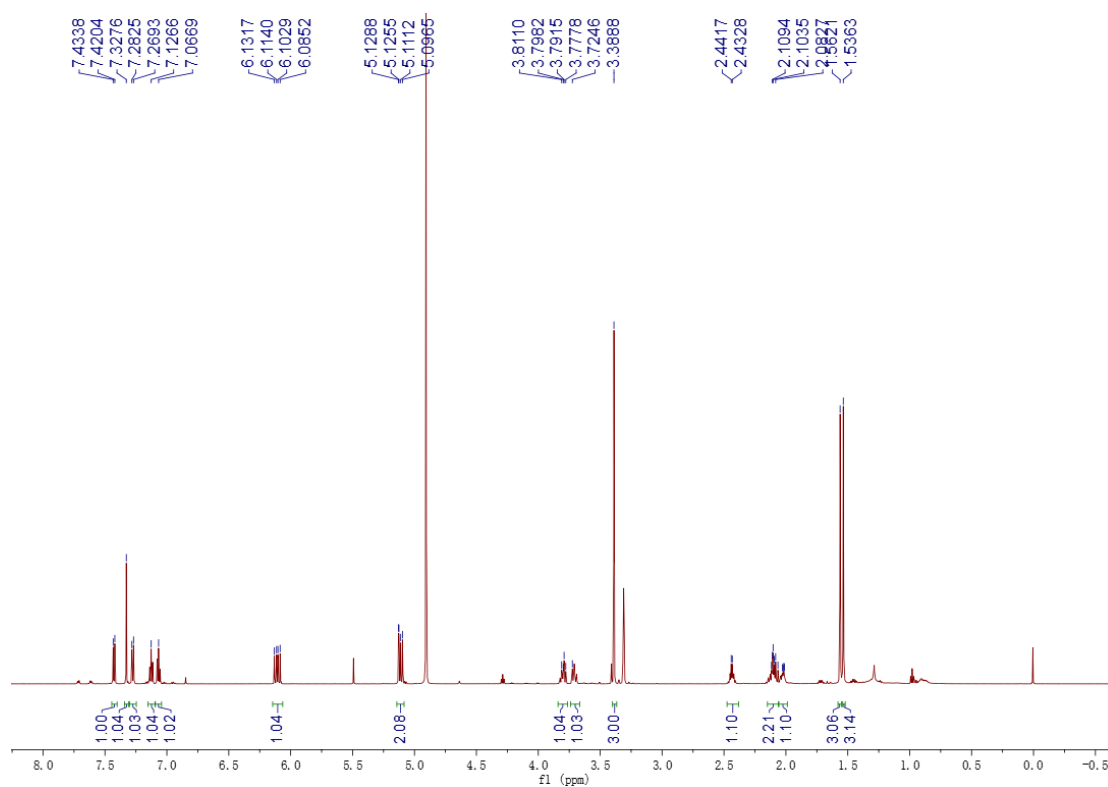

Figure S44  $^1\text{H}$  NMR spectrum (600 MHz, methanol- $d_4$ ) of compound **8**

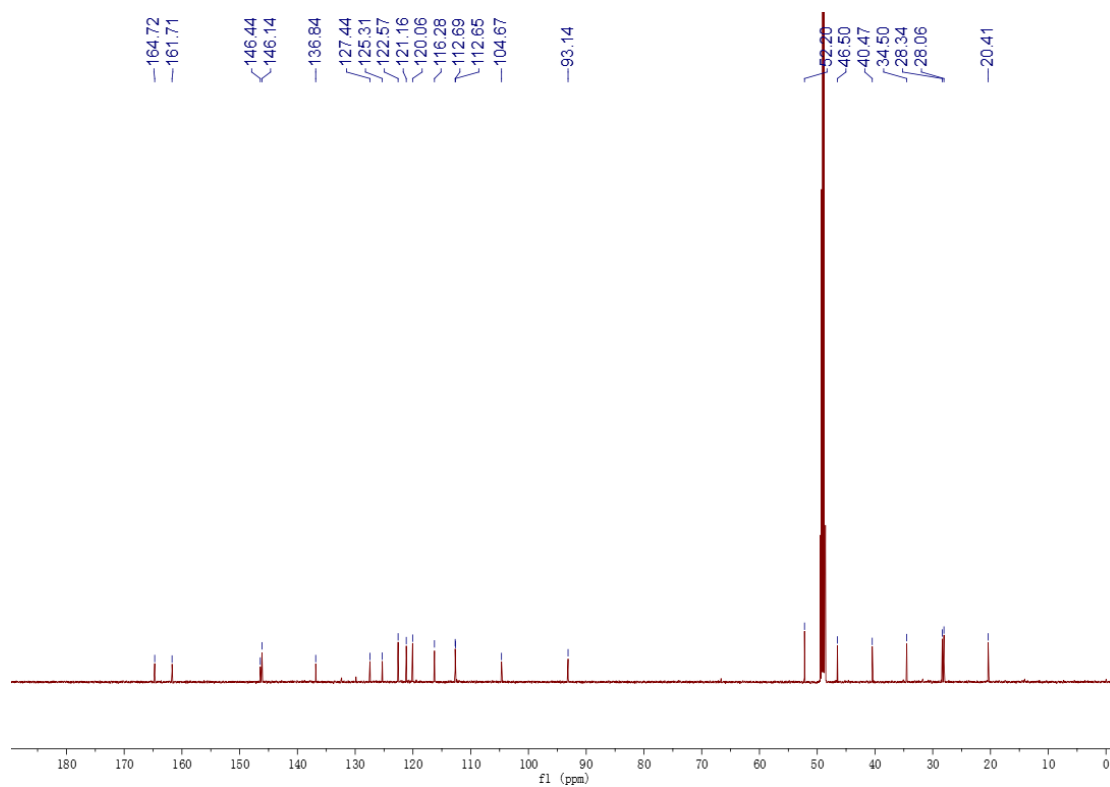

Figure S45  $^{13}\text{C}$  NMR spectrum (600 MHz, methanol- $d_4$ ) of compound **8**

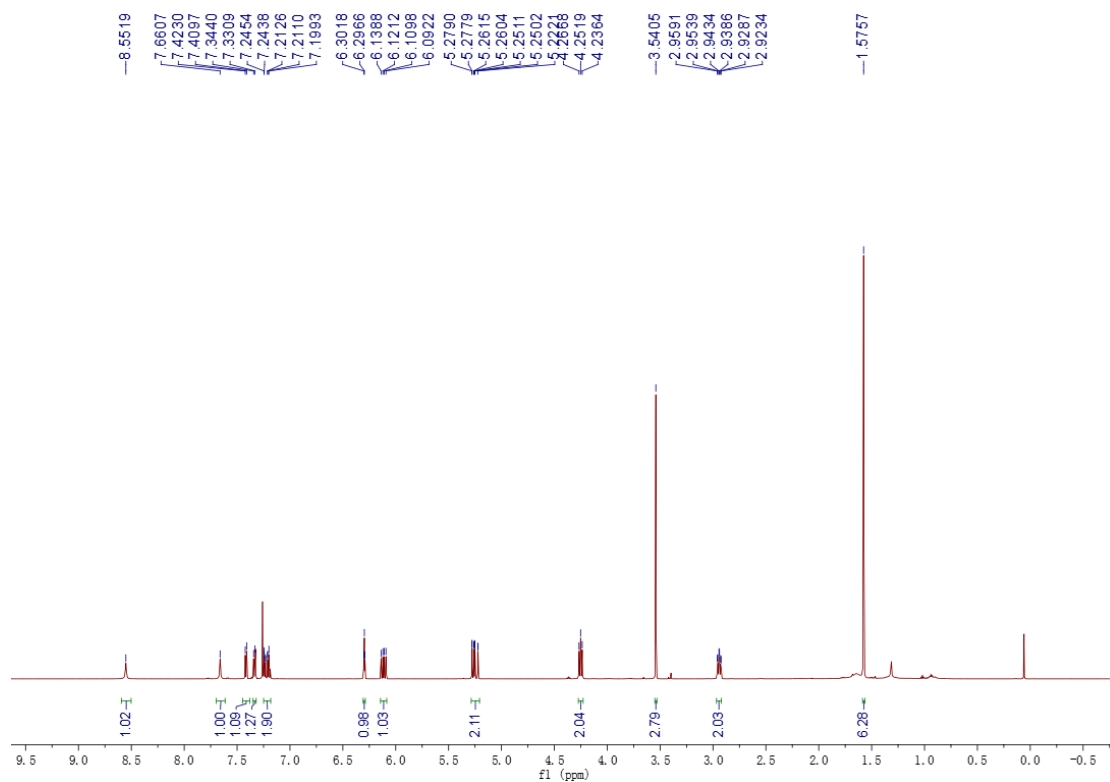

Figure S46  $^1\text{H}$  NMR spectrum (600 MHz, chloroform- $d$ ) of compound **9**

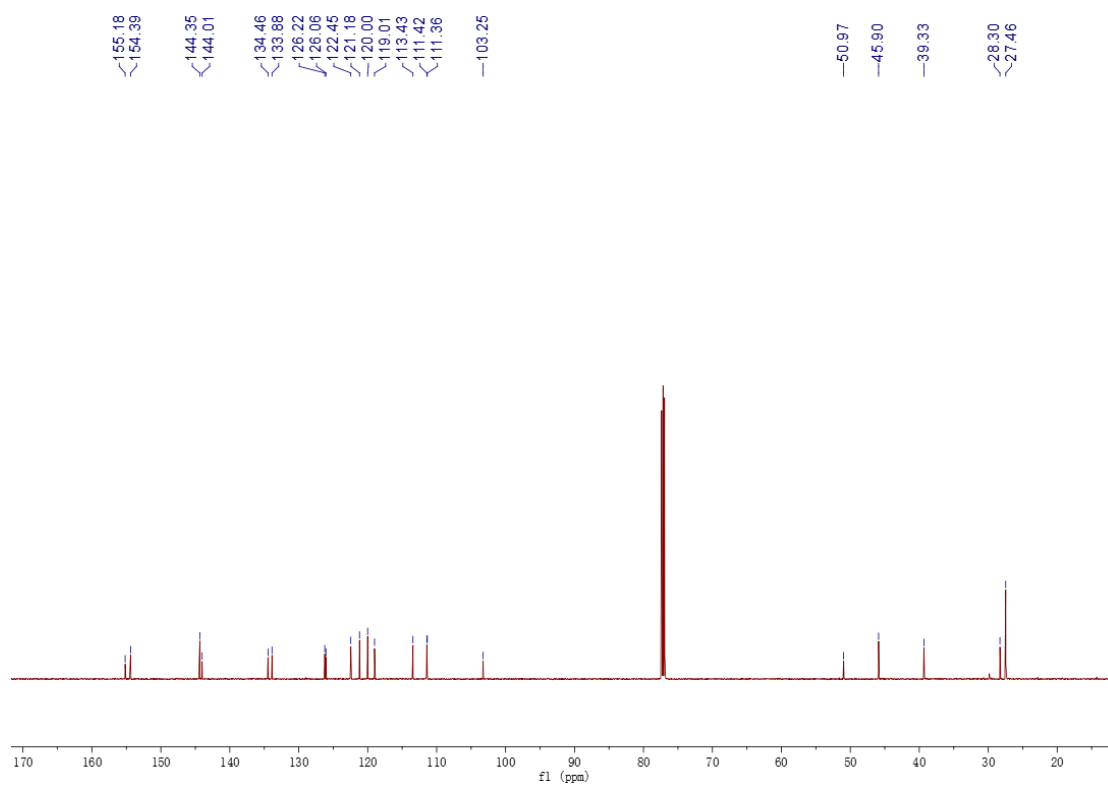

Figure S47  $^{13}\text{C}$  NMR spectrum (600 MHz, chloroform- $d$ ) of compound **9**

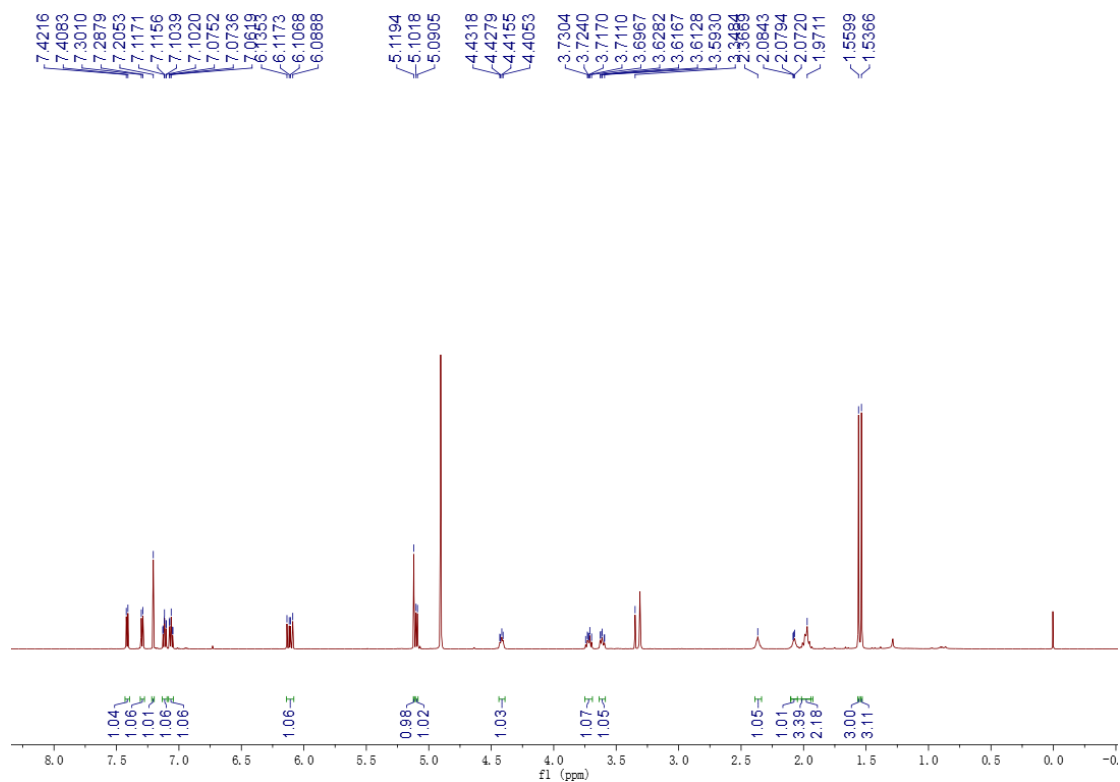

Figure S48  $^1\text{H}$  NMR spectrum (600 MHz, methanol- $d_4$ ) of compound **10**

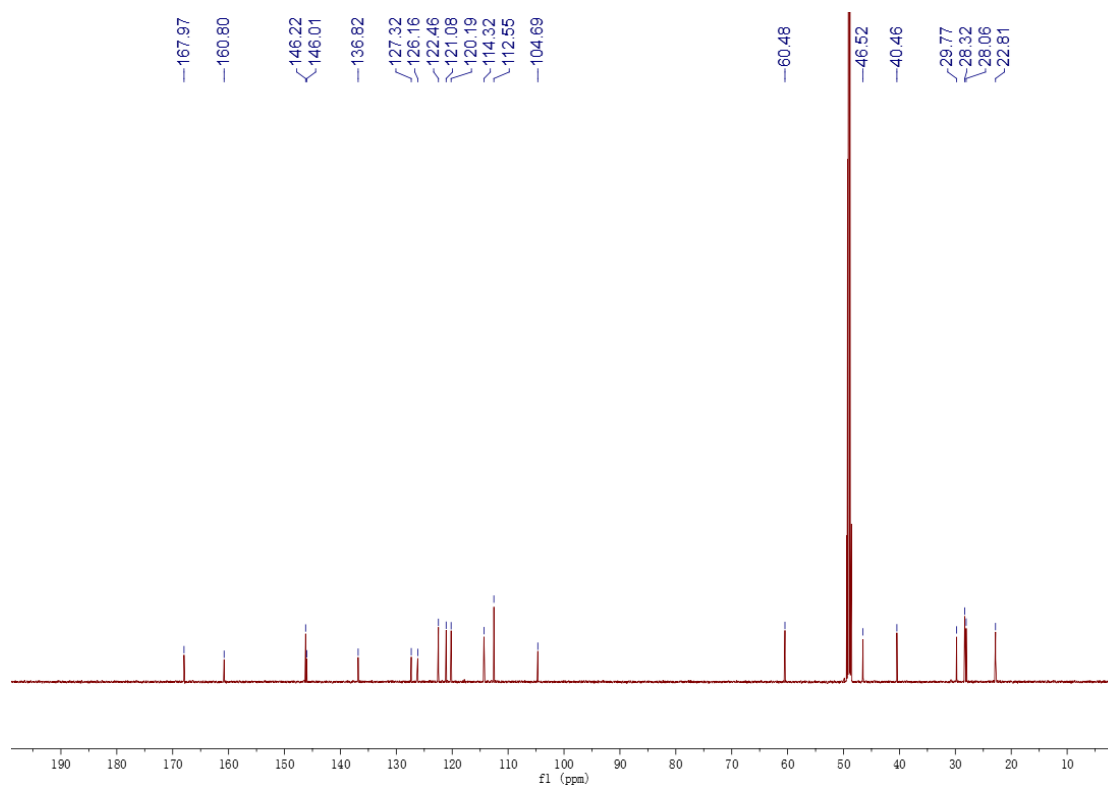

Figure S49  $^{13}\text{C}$  NMR spectrum (600 MHz, methanol- $d_4$ ) of compound **10**

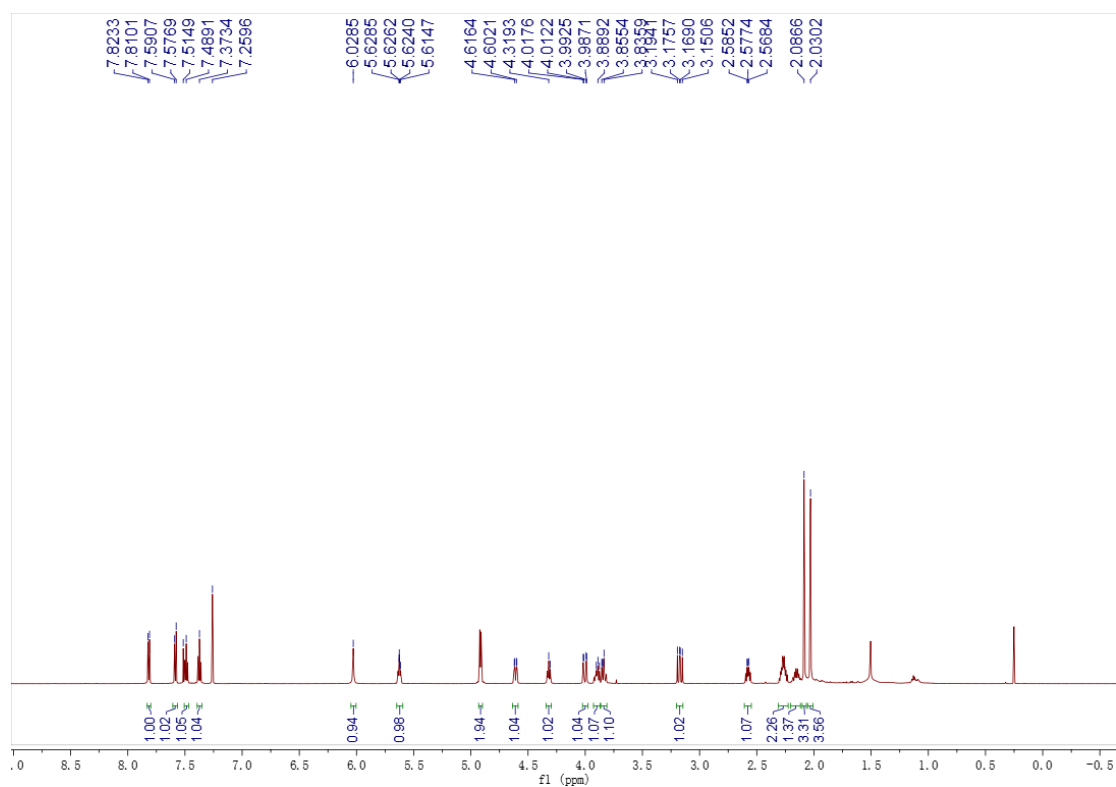

Figure S50  $^1\text{H}$  NMR spectrum (600 MHz, chloroform- $d$ ) of compound **11**

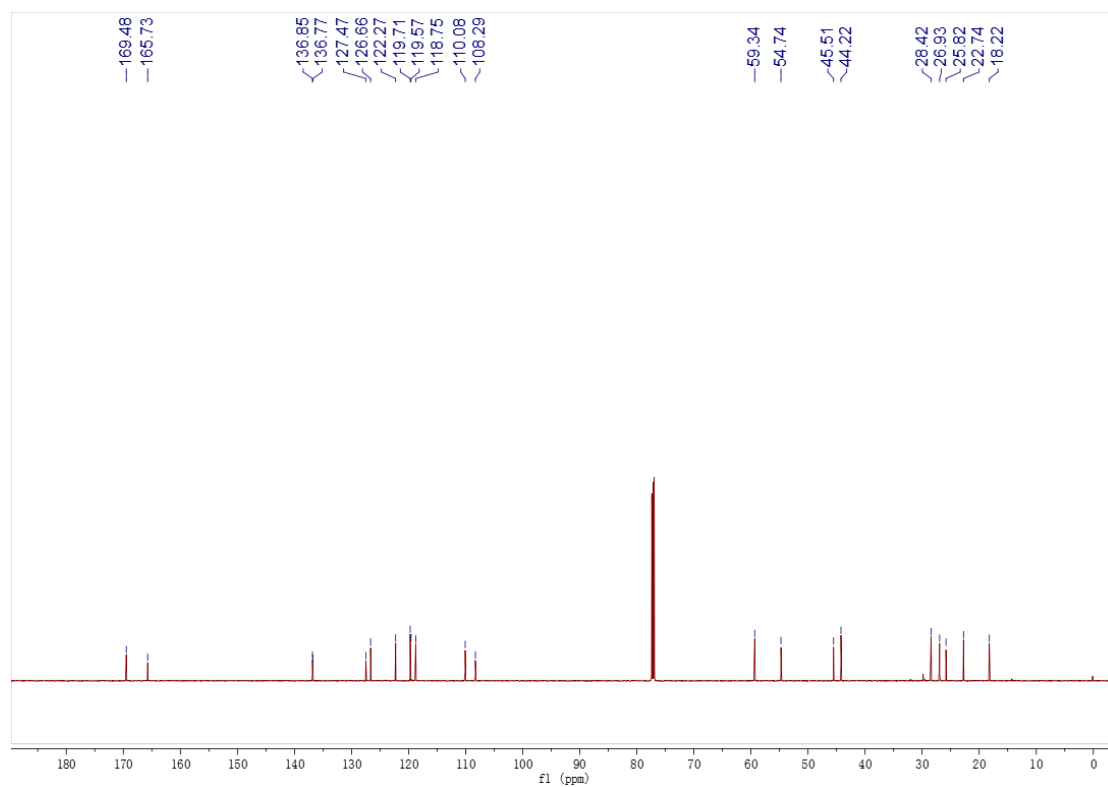

Figure S51  $^{13}\text{C}$  NMR spectrum (600 MHz, chloroform-*d*) of compound **11**

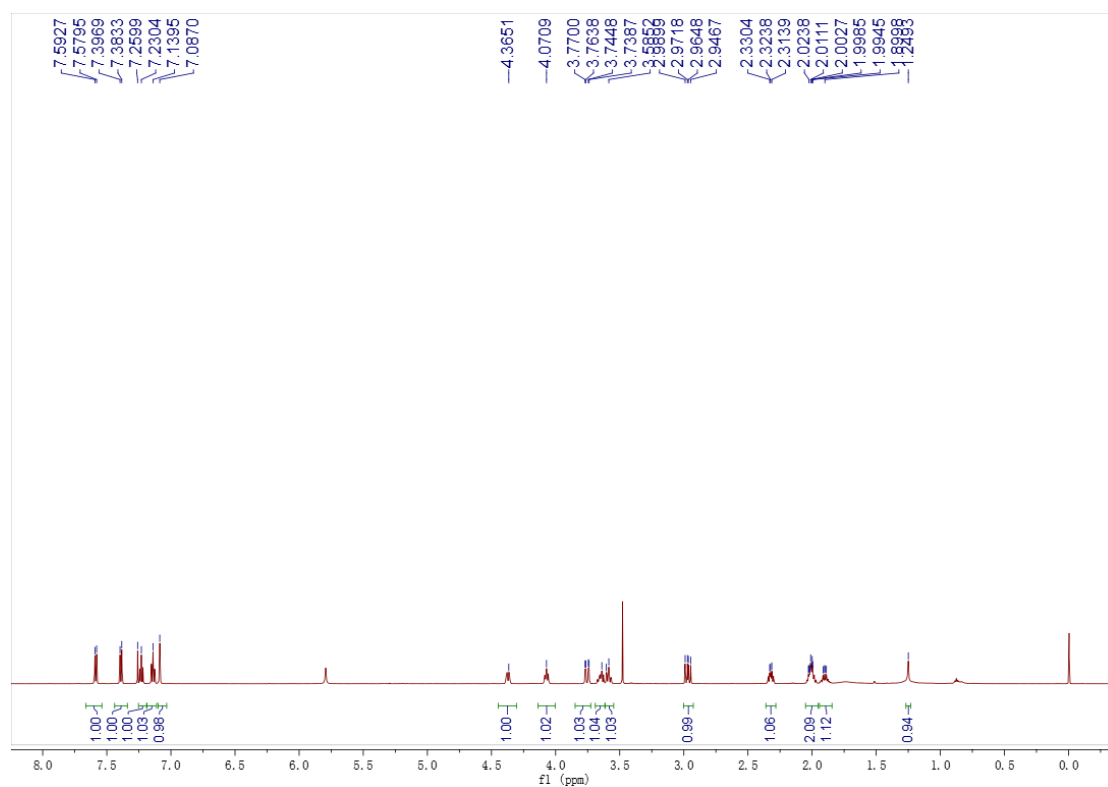

Figure S52  $^1\text{H}$  NMR spectrum (600 MHz, chloroform-*d*) of compound **12**

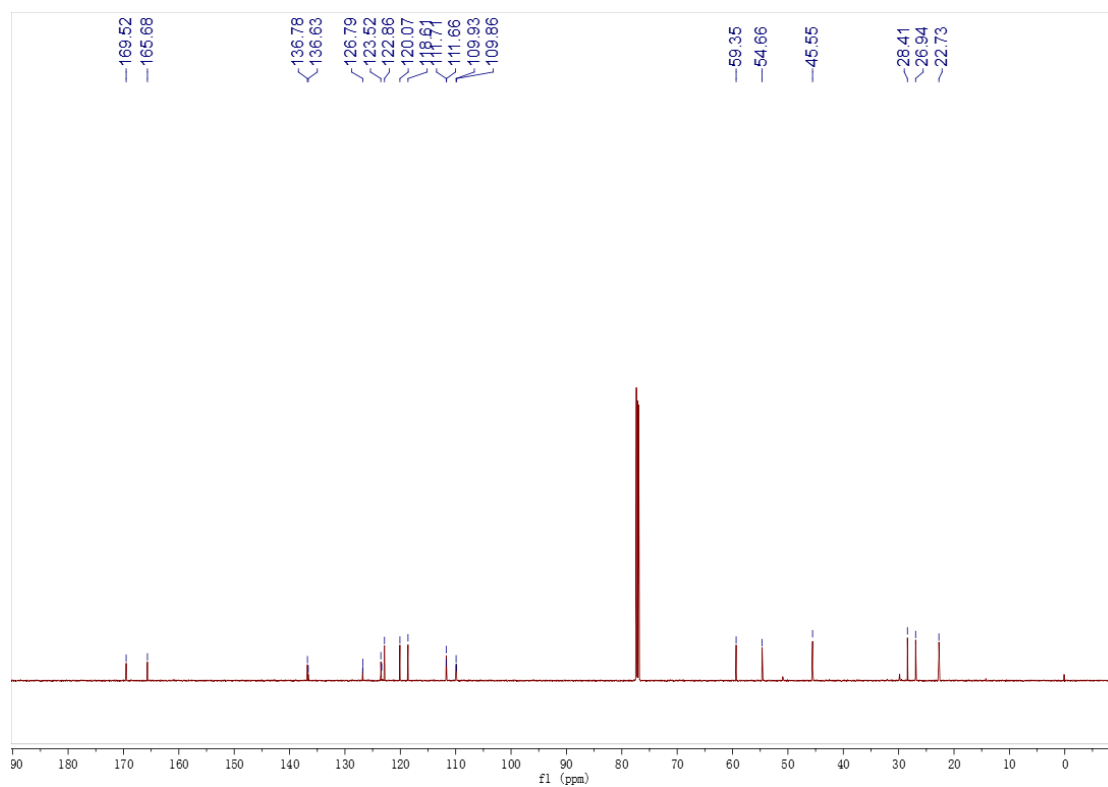

Figure S53  $^{13}\text{C}$  NMR spectrum (600 MHz, chloroform- $d$ ) of compound **12**

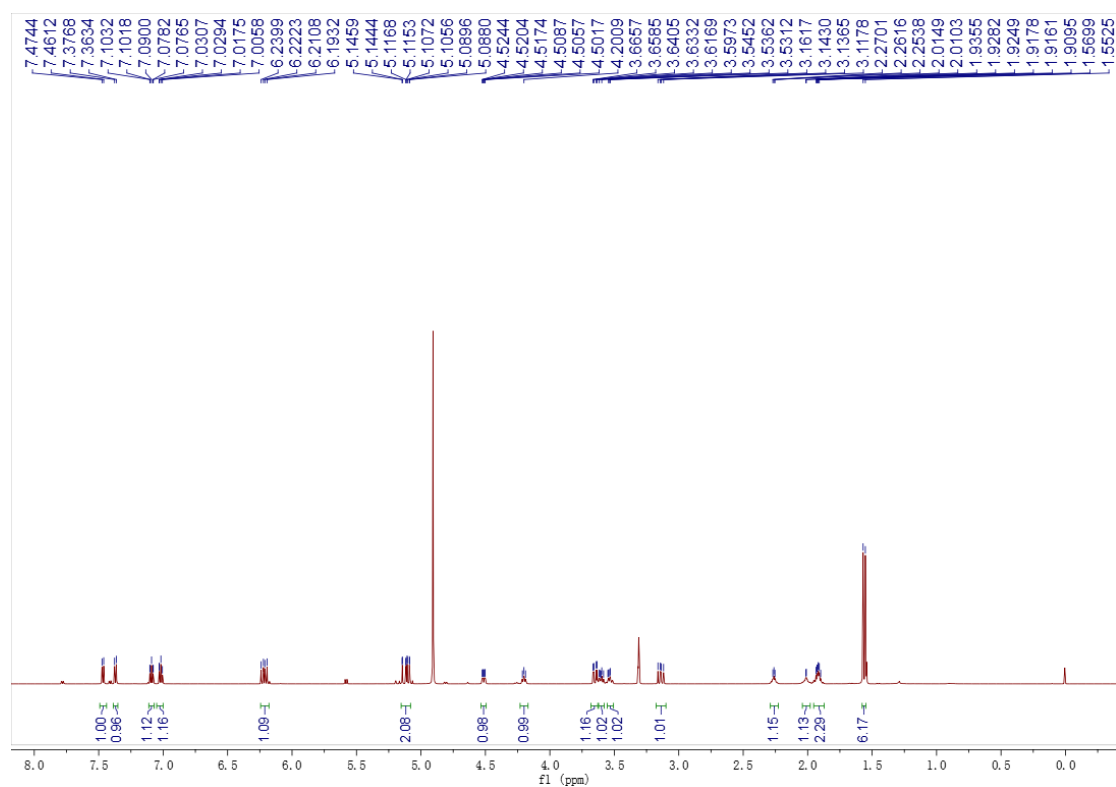

Figure S54  $^1\text{H}$  NMR spectrum (600 MHz, methanol- $d_4$ ) of compound **13**

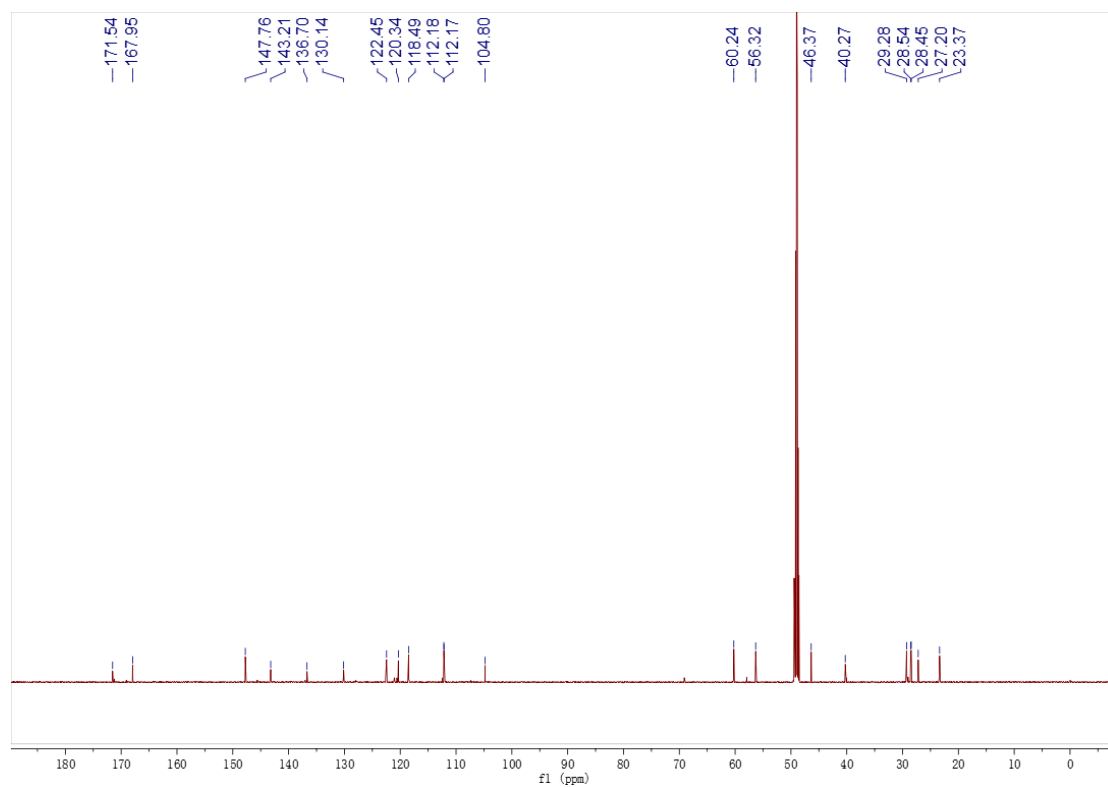

Figure S55  $^{13}\text{C}$  NMR spectrum (600 MHz, methanol- $d_4$ ) of compound **13**

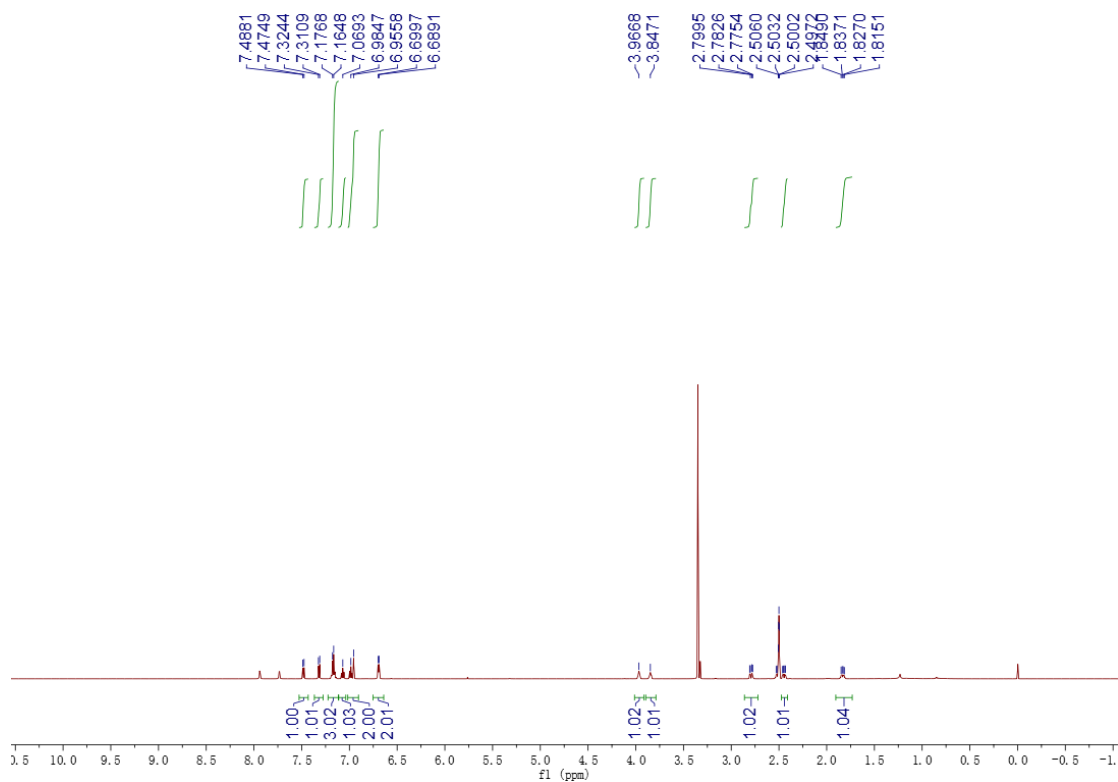

Figure S56  $^1\text{H}$  NMR spectrum (600 MHz, DMSO- $d_6$ ) of compound **14**

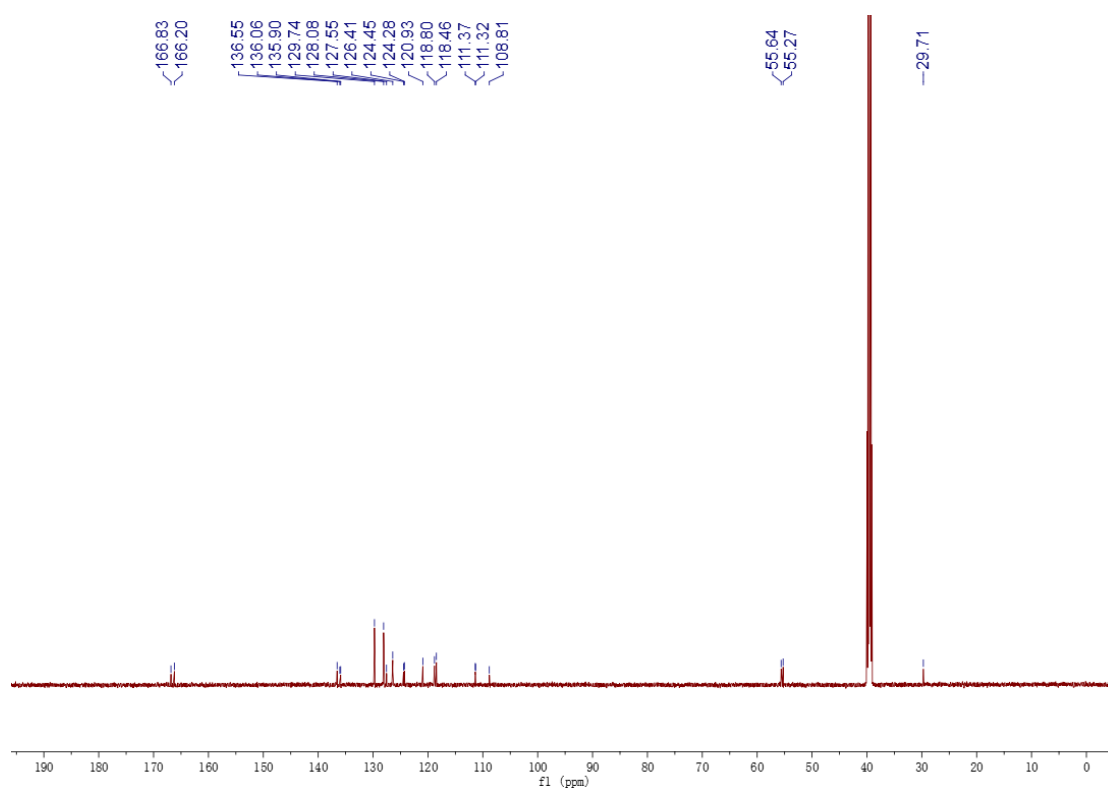

Figure S57  $^{13}\text{C}$  NMR spectrum (600 MHz,  $\text{DMSO-}d_4$ ) of compound **14**

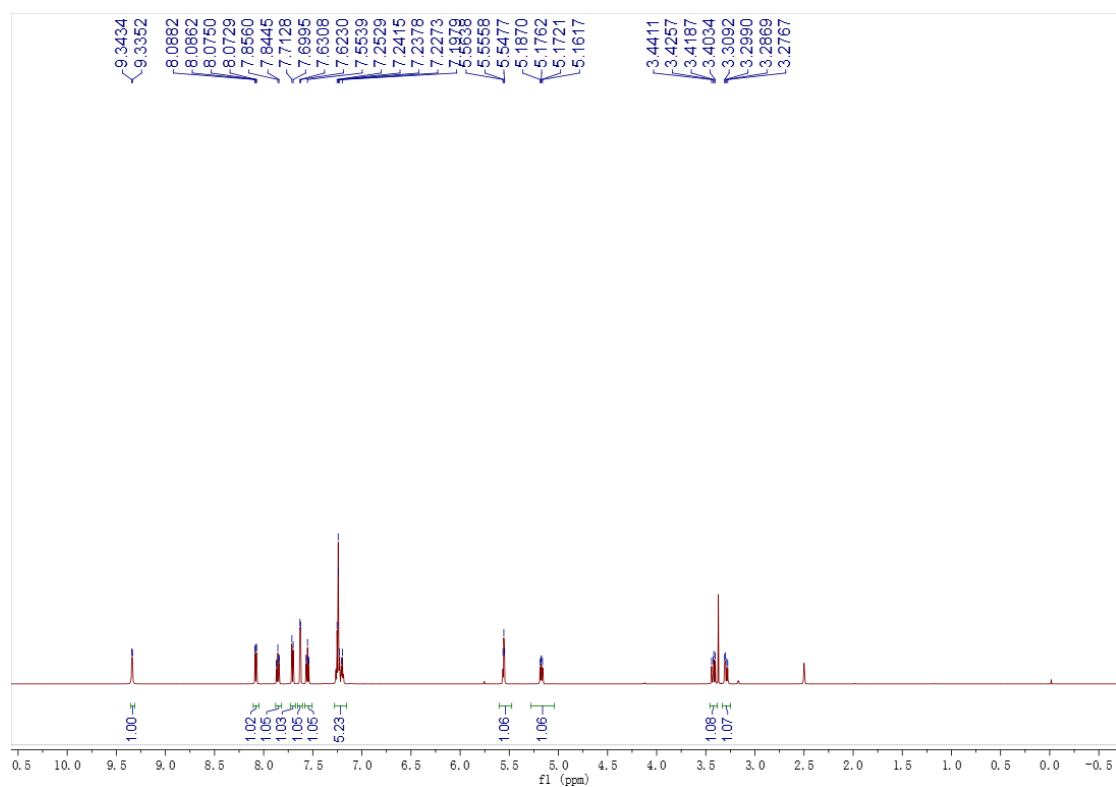

Figure S58  $^1\text{H}$  NMR spectrum (600 MHz,  $\text{DMSO-}d_6$ ) of compound **15**



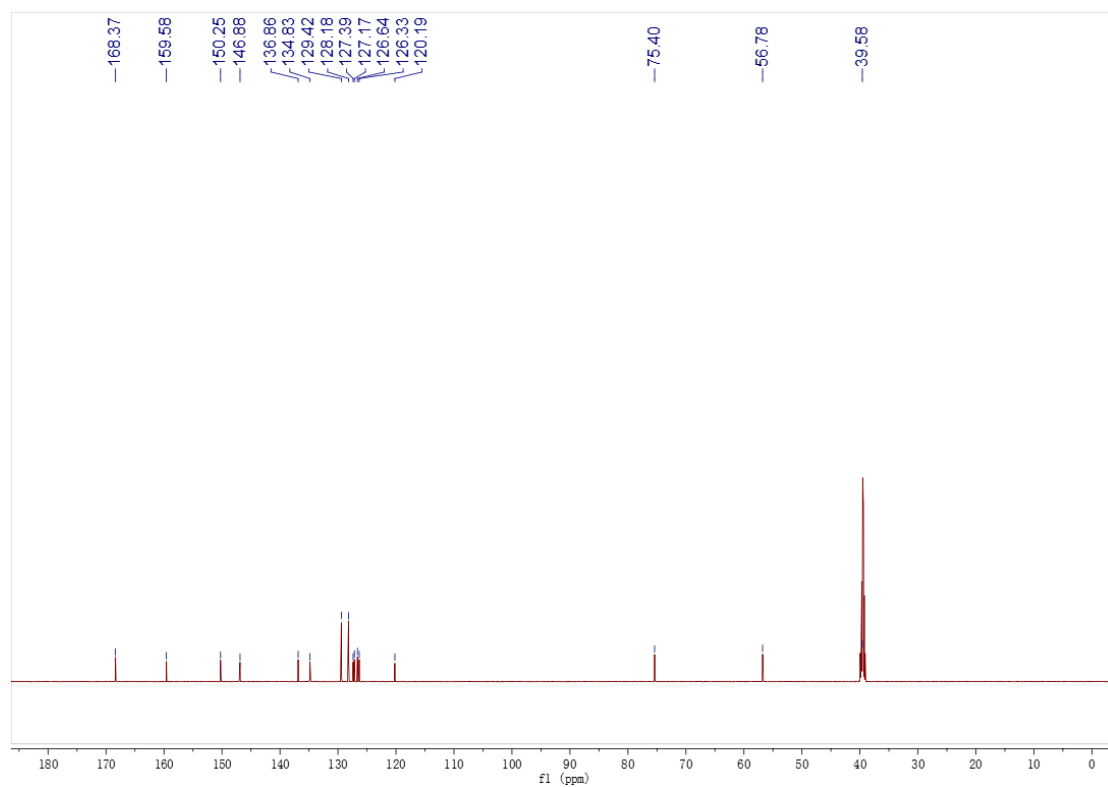

Figure S59 <sup>13</sup>C NMR spectrum (600 MHz, DMSO-*d*<sub>4</sub>) of compound **15**

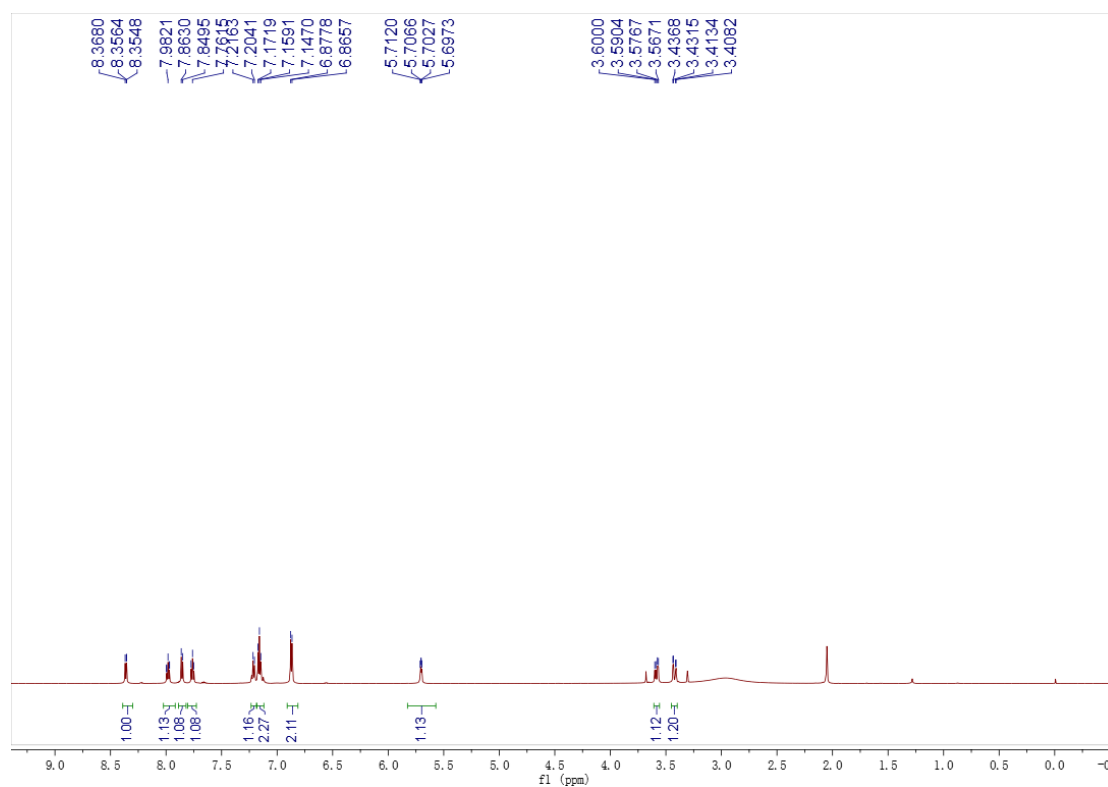

Figure S60 <sup>1</sup>H NMR spectrum (600 MHz, acetone-*d*<sub>6</sub>) of compound **16**

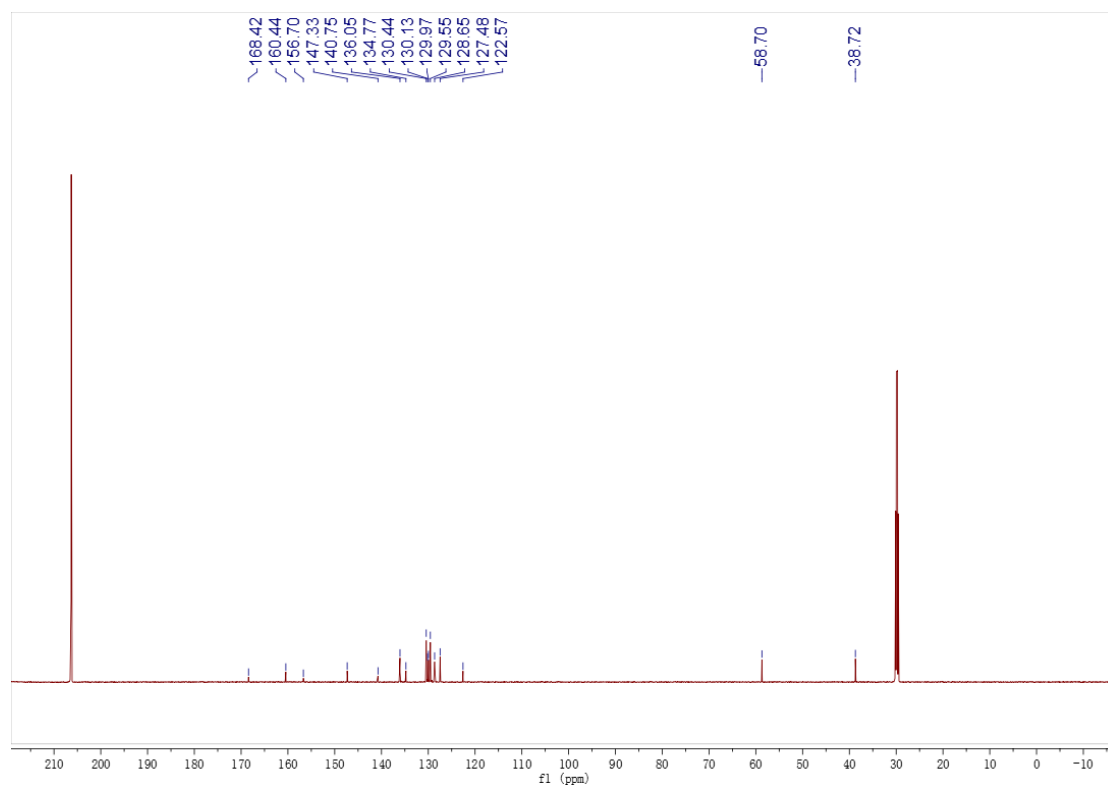

Figure S61  $^{13}\text{C}$  NMR spectrum (600 MHz, acetone- $d_4$ ) of compound **16**
